# **F<sub>o</sub>-F<sub>1</sub> coupling and symmetry mismatch in ATP synthase resolved in every F<sub>o</sub> rotation step**

**Shintaroh Kubo<sup>1,2,\*</sup>, Toru Niina<sup>1</sup>, & Shoji Takada<sup>1,\*</sup>**

<sup>1</sup> Department of Biophysics, Graduate School of Science, Kyoto University, Kyoto 606-8502, Japan

<sup>2</sup> Department of Anatomy and Cell Biology, McGill University, Montréal, Québec H3A 0C7, Canada

\* Corresponding author:

Shintaroh Kubo, Department of Anatomy and Cell Biology, McGill University, Montréal, Québec H3A 0C7, Canada. e-mail: [shintaroh.kubo@mail.mcgill.ca](mailto:shintaroh.kubo@mail.mcgill.ca)

Shoji Takada, Department of Biophysics, Graduate School of Science, Kyoto University, Kyoto 606-8502, Japan e-mail: [takada@biophys.kyoto-u.ac.jp](mailto:takada@biophys.kyoto-u.ac.jp)

## Abstract

The  $F_0F_1$  ATP synthase, essential for cellular energy production, is composed of the  $F_0$  and  $F_1$  rotary motors. While both  $F_0$  and  $F_1$  have pseudo-symmetric structures, their symmetries do not match. How the symmetry mismatch is solved remains elusive due to missing intermediate structures of rotational steps. Here, for ATP synthases with 3- and 10-fold symmetries in  $F_1$  and  $F_0$ , respectively, we uncovered the mechanical couplings between  $F_0$  and  $F_1$  at every  $36^\circ$  rotation step via molecular dynamics simulations and comparison of cryo-electron microscopy structures from three species. We found that the frustration is shared by several elements. The  $F_1$  stator partially rotates relative to the  $F_0$  stator via elastic distortion of the b-subunits. The rotor can be distorted. The c-ring rotary angles can be deviated from symmetric ones. Additionally, the  $F_1$  motor may take non-canonical structures relieving stronger frustration. Together, we provide comprehensive understanding to solve the symmetry mismatch.

**Key words:**  $F_0F_1$  ATP synthase, Molecular motor, Molecular dynamics simulation

## Introduction

Adenosine triphosphate (ATP) is mainly synthesized by the enzyme  $F_0F_1$  ATP synthase<sup>1-3</sup>. The enzyme is composed of two rotary motors, the  $F_0$  and  $F_1$  motor, and these motors are connected by two stalks, a central rotor and a peripheral stalk (Fig. 1a). The membrane-embedded  $F_0$  motor rotation driven by the proton motive force causes the central rotor rotation. The latter induces a series of conformational changes in the  $F_1$  motor, where ATP is synthesized from adenosine diphosphate (ADP) and inorganic phosphate (Pi). The  $F_0F_1$  ATP synthase is also known as a reversible machine, which can hydrolyze ATP to pump protons against the proton motive force.

The  $F_1$  motor contains the central rotor ( $\gamma/\epsilon$ -subunit in bacterial  $F_1$ ) and an  $\alpha_3\beta_3$  hexamer made of three  $\alpha\beta$  dimers (Fig. 1a). Each  $\alpha\beta$  dimer has catalytic sites for the ATP synthesis reaction and take three distinct chemical states and conformations<sup>4</sup>, which are conventionally denoted as the ATP-bound state (TP for brevity), the ADP-bound state (DP), and the empty state (E). Especially, the  $\beta$ -subunit takes markedly different conformations among the three states; for the case of the *Bacillus* PS3 ATP synthase, which will be our target in this study, its C-terminal segment takes a "closed" conformation in the TP state, while it takes an "open" conformation in the DP and the E states<sup>5</sup>. Since a single-molecule measurement showed that the  $F_1$  motor in the ATP hydrolysis mode uncovered 120°-stepwise rotation of the central rotor, accompanied by progress of the chemical states in  $\alpha_3\beta_3$ <sup>6</sup>. Thus, coupled with the nucleotide-dependent conformational change in the  $\alpha/\beta$ -subunits, one round of the  $F_1$  motor results in the hydrolysis or synthesis of three ATP molecules, depending on the central rotor direction. The  $F_0$  motor is made of an a-subunit and a c-ring, which is a ring-shaped c-subunit oligomer working as a rotor (Fig. 1a). The number of c-subunits in the c-ring varies between 8-17 depending on the species<sup>7-13</sup>; 10 subunits in the *Bacillus* PS3 ATP synthase. Each c-subunit has one key proton-relaying residue. Single-molecule experiments for *Escherichia coli* ATP synthase (10 subunits) identified 36° stepwise c-ring rotations<sup>14</sup>. Thus, one round of the  $F_0$  motor was driven by the transfer of the same number of protons as that of c-subunits.

In contrast to the mechanisms of each motor, the mechanism of the coupling between the  $F_0$  and  $F_1$  motors is less clear. Because the number of c-subunits in the c-ring is not a multiple of three in

most cases, the mean number of protons necessary for the synthesis of one ATP is not an integer value, which is sometimes called a symmetry mismatch. There has been much debate regarding the mechanism by which  $F_0F_1$  ATP synthase resolves this mismatch<sup>15</sup>. For *Bacillus* PS3 ATP synthases, the two motors are connected via a central rotor made of  $c_{10}\gamma\epsilon$  and a peripheral stalk made of  $b_2\delta$  (Fig. 1a). Some early studies suggested the elastic distortion of the central rotor,  $\gamma$ -subunit<sup>16–18</sup>. Other studies have anticipated the role of  $\delta$ <sup>19</sup>. Recent cryo-EM structures of mitochondria and *Bacillus* PS3 ATP synthases point to distortion in b-subunits<sup>5,20</sup>. From recent cryo-EM studies, the symmetric mismatch and the relatively rigid rotor together imply that the  $\alpha_3\beta_3$  hexamer rotate relative to the a-subunit<sup>19,21</sup>. Sobti *et al.* resolved three different rotational states and one sub-state in *E. coli* ATP synthase. The sub-state structure essentially had the same  $F_1$  configuration as one of the three state structures, but the  $c_{10}$ -ring together with the  $F_1$  stator,  $c_{10}\alpha_3\beta_3\gamma\epsilon$ , rotated relative to the  $F_0$  stator. Comparing individual conformations, we see that the b-subunits have significantly different conformations. Therefore, the existence of the sub-state and the flexibility of the b-subunit may be necessary for resolving the symmetry mismatch. Notably, however, the cryo-EM models in Sobti *et al.* include structural models for four  $c_{10}$ -ring rotation states out of ten possible rotational states. Perhaps other states are more fragile and/or more short-lived, so that high-resolution models could not be built. Moreover, cryo-EM models provide static snapshots, as usual; for example, how the sub-state arises, how the b-subunit distortion resolves the mismatch, and when and how the  $F_1$ -motor undergoes structural changes in response to the c-ring rotation remain unclear.

In this study, to address the  $F_0$ - $F_1$  coupling and the molecular mechanisms to solve the symmetry mismatch, we performed molecular dynamics (MD) simulations that mimic the ATP synthesis dynamics for one round of rotation in the holo-complex of the *Bacillus*  $F_0F_1$  ATP synthase. While many molecular simulations have been reported so far for each of the  $F_0$  and  $F_1$  motors<sup>18,22–28</sup>, to the best of our knowledge, this study provides MD simulations for the first time for one round of ATP synthase holo-complex. Our dynamic simulations showed the order and timing of the structural changes in the three  $\alpha\beta$ -pairs in the  $F_1$  motor during ten  $36^\circ$ -rotation steps of the  $F_0$  motor. Furthermore, relaxation simulations with a fixed c-ring rotation angle in every  $36^\circ$ -step exhibited the c-ring-dependent partial rotation of the  $F_1$  stator relative to the  $F_0$  stator and some twists in the rotor.

Then, motivated by the simulation results, we conducted a comparative analysis of cryo-EM structures from three species, accounting for the structural changes in the ATP synthases. Together, we reveal how to solve the symmetry mismatch in  $F_0F_1$  ATP synthesis in unprecedented detail.

## Results and Discussion

### Simulating the rotation dynamics in the ATP synthase holo-complex

The *Bacillus* PS3 ATP synthase cryo-EM study provides holo-complex structure models in the three rotational states: A (PDB ID: 6N2Y, Fig. 1a left), B (PDB ID: 6N2Z), and C (PDB ID: 6N30)<sup>5</sup>. In all of these holo-complex models,  $F_1$  was in the catalytic dwell. We introduce the numbering of the three  $\alpha\beta$  pairs,  $\alpha\beta 1$ ,  $\alpha\beta 2$ , and  $\alpha\beta 3$ , counterclockwise starting from the  $\alpha/\beta$ -subunits furthest from the b-subunit (Fig. 1a, middle). In the A state,  $\alpha\beta 1$ ,  $\alpha\beta 2$ , and  $\alpha\beta 3$  are in the E, TP, and DP states, respectively. The structural change from A to B (the AB process) involves the counterclockwise rotation of  $c_{10}$ -ring by  $3 \times 36^\circ$ , together with the progress of the chemical steps in the three  $\alpha\beta$  pairs;  $\alpha\beta 1$ ,  $\alpha\beta 2$ , and  $\alpha\beta 3$  change to the DP, E, and TP states, respectively. Similarly, the transitions from B to C (the BC process) and from C to A (the CA process) involve rotations by four and three  $36^\circ$  c-ring rotation steps, respectively, coupled with the chemical state changes in  $\alpha\beta$  pairs. We call this whole process the 3-4-3 pathway, assuming that the entire process starts and ends in the A state.

Given the 3-4-3 pathway in the three cryo-EM rotational states, we envisioned to simulate the process that the  $F_1$  motor in the A state would reach the B state when the  $F_0$   $c_{10}$ -ring rotates counterclockwise by  $3 \times 36^\circ$ . To simulate the conformational change in the AB process, we need to model in a way that each  $\alpha\beta$  pair can accommodate both A and B state conformations. For this purpose, we employed a double-basin model that encodes A and B state conformations separately for each  $\alpha\beta$  system (see Methods for details). The double-basin model concisely builds two distinct conformational basins controlling both the energy barrier in between and the relative stabilities of the two basins<sup>29-31</sup> (Fig. 1b). Also, for the BC and CA processes, introducing the double-basin models that

connect the B and C states and that connect the C and A states, we expected to observe the respective state transitions in the  $F_1$  motor while the  $c_{10}$ -ring rotates  $4 \times 36^\circ$  and  $3 \times 36^\circ$  degrees, respectively (Fig. 1c). To ensure the energetics of the ATP synthesis process, we set the summation of the relative stabilities of the three  $\alpha\beta$  double-basin models in the AB, BC, and CA processes to  $\sim +36$  kcal, which approximates the free energy increase for the synthesis of 3 ATP molecules from ADP and Pi.

In the simulations, we rotated the  $c_{10}$ -ring by  $36^\circ$  with a constant angular velocity over  $10^6$  MD steps, followed by a  $c_{10}$ -ring pause for  $9 \times 10^6$  MD steps. Note that  $10^4$  MD steps were denoted as one frame. For each case, we repeated the same simulations ten times with different stochastic forces. The structural transitions in each  $\alpha\beta$  are monitored by its reaction coordinate  $\chi$ , which takes negative and positive values when  $\alpha\beta$  is in the pre- and post- states in the double-basin system, respectively. For the AB process, we repeated this rotation step four times (the upper c-ring panel of Fig. 2ab). For the BC and CA processes, we began with  $10 \times 10^6$  MD equilibration steps in the initial  $c_{10}$ -ring angle and then repeated the rotation step four times (the upper c-ring panel of Fig. 2cd and Fig. 2e, respectively).

## How many $F_O$ c-ring rotation steps are necessary to induce the $F_1$ nucleotide state transition?

We monitored the structural changes in each  $\alpha\beta$  (Fig. 2,  $\chi$  pre  $\rightarrow$  post) as well as other structures. When all three  $\chi$ 's in  $F_1$  changed from negative to positive values, we regarded  $F_1$  to have completed its transition. Fig. 2a shows a representative trajectory of the AB process: (1) The  $\alpha\beta 1$  started transitions from the E state to the DP state at the  $\sim 100$ th frame immediately after the c-ring rotated  $36^\circ$ , followed by rapid transitions back and forth. (2) The  $\alpha\beta 3$  made a transition from the DP to the TP state at the  $\sim 2200$ th frame when the c-ring completed the third  $36^\circ$  rotation. (3) Finally,  $\alpha\beta 2$  transitioned from the TP to the E state at the  $\sim 2500$ th frame, corresponding to the dissociation of a synthesized ATP molecule. At this stage, all three  $\alpha\beta$  pairs completed their transitions (blue triangle in the figure). This was within the third rotation step. Thus, in this trajectory, three c-ring rotation steps induced a complete structural transition in  $F_1$  during the AB process. Of the ten repeated trajectories, six showed

similar results; three c-ring rotation steps induced complete  $F_1$  transitions. In the two trajectories, four c-ring rotation steps were necessary to induce  $F_1$  transitions (one case depicted in Fig. 2b). The remaining two did not complete the  $F_1$  transition at the end of the simulations (Supplementary Fig. 1a). Thus, as expected from the cryo-EM structures, we observed that in the majority of cases, the  $F_1$  structural transitions in the AB process were completed with the three  $36^\circ$ -c-ring-rotation steps.

Next, we describe the BC process. For this process, we first took the 3000th frame snapshot in the representative trajectory of the AB process (shown in Fig. 2a) as the initial structure. Fig. 2c shows the typical trajectory of the BC process. In this trajectory, the  $\alpha\beta 1$  and  $\alpha\beta 2$  pairs exhibited unstable fluctuations until  $\alpha\beta 3$  transitioned from the TP to the E state at the  $\sim 4200$ th frame. Once  $\alpha\beta 3$  is in the E state, both  $\alpha\beta 1$  and  $\alpha\beta 2$  are stabilized in the TP and DP states. The overall structural change in  $F_1$  was completed after the fourth  $c_{10}$ -ring rotation step. All trajectories which complete conformational changes (four out of ten) were completed with four c-ring  $36^\circ$ -rotation steps (Supplementary Fig. 1b). Therefore, we conclude that four  $36^\circ$ -rotation steps are necessary to induce complete structural changes in  $F_1$  in the BC process with this initial structure. We mentioned about the BC process on the 4-3-3 pathway in Supplementary Text 1.

Finally, the CA process is simulated. First, we started the simulation with the 5000th frame snapshot of the representative BC process trajectory in the 3-4-3 pathway. Fig. 2e shows a typical trajectory (Supplementary Fig. 1d). Initially,  $\alpha\beta 3$  gradually changed from the E to the DP state between the 200th and 900th frames. Then,  $\alpha\beta 1$  made the transitions from the TP to the E state and settled down in the E state at the  $\sim 3100$ th frame right when the third c-ring rotation step in the CA process was over. This is quickly followed by the transition in  $\alpha\beta 2$  from the DP to the TP state around the 3300th frame when the overall conformational change in this process was over. The  $F_1$  transition was completed within the third  $36^\circ$ -c-ring-rotation step in six of the ten trajectories tested. The  $F_1$  transition was completed within the second and fourth  $36^\circ$ -rotation steps, each in one trajectory. The remaining two trajectories did not exhibit complete structural changes. Therefore, the dominant pathway in the CA process completes the  $F_1$  state transitions by the three c-ring rotation steps. We mentioned about the CA process on the 4-3-3 pathway in Supplementary Text 1 and Fig. 2bd.

Altogether, our simulation predominantly showed the 3-4-3 pathway, which is in harmony with the cryo-EM studies. Additionally, we noticed a common feature as suggested in a classic work<sup>1,32</sup>: Of the three  $F_1$   $\alpha\beta$  structure transitions in each process, the  $\alpha\beta$  that changes from the TP to the E state is a bottleneck that tends to decide the number of necessary 36°-rotation steps. ATP synthesis in this enzyme has the rate-limiting process of the product dissociation.

## Partial rotation of the $F_1$ stator accompanied by the b-subunits bending

Recent cryo-EM studies by Murphy *et al.*<sup>19</sup> and Sobti *et al.*<sup>21</sup> reported more than three rotational states for ATP synthases from *Polytomella* sp. and *E. coli*, respectively, both of which contain a  $c_{10}$ -ring. In both cases, they found varying degrees of rotation of the  $F_1$  stator relative to the  $F_0$  stator, raising the possibility of a partial rotation of the  $F_1$  stator as a mean to solve the symmetry mismatch. However, these structural models contain only a limited c-ring rotation step. How was the symmetry mismatch solved in every 36°-rotation step? To address this point, we calculated the rotary angle  $\theta$  of the  $F_1$  stator relative to the  $F_0$  stator during the trajectories (Fig. 3a-e); here, the  $F_1$  stator and the  $F_0$  stator mean  $F_1$   $\alpha_3\beta_3$  and  $F_0$  a-subunit, respectively. For this purpose, we fixed the rotation axis of the  $F_0$   $c_{10}$ -ring to the z-axis and  $F_0$  a-subunit to the positive x-axis and monitored the rotary angle  $\theta$  of  $F_1$   $\alpha_3\beta_3$  around the z-axis (further details in the Methods). Fig. 3a-e plot the time courses of  $\theta$  for the same five trajectories as in Fig. 2a-e.

First, we examined the  $F_1$  stator angle  $\theta$  of the AB process (Fig. 3ab). The  $F_1$  stator started to rotate ~20° counterclockwise dragged by the  $c_{10}\gamma\epsilon$  rotation. In addition, the  $\gamma$ -subunit is distorted ~10° (the fourth panel of Fig. 3a). When the c-ring rotates counterclockwise, the rotation up to 10° tends to be absorbed by the distortion of the  $\gamma$ -subunit. In the subsequence process within the AB process in the 3-4-3 pathway (Fig. 3a), the  $F_1$  stator tends to return to the initial angle. Importantly, the return of the  $F_1$  stator angle occurred together with the structural transition in  $F_1$ . Once  $F_1$  adopts



conformations compatible with the cryo-EM structure of the B state, the  $F_1$  stator can accommodate the angle  $\theta \sim 0$  (Fig. 3f, left).

Next, we analyzed the simulation trajectories of the BC process in the 3-4-3 pathway (Fig. 3c). When the  $c_{10}$ -ring started to rotate at the 1000th frame (the fourth cumulative c-ring rotation step is denoted as  $n = 4$ ), the  $F_1$  stator is dragged by the rotor rotation, similarly to the above case ( $n = 1$ ). At the 1000th frame, while the  $c_{10}$ -ring rotated by  $36^\circ$ , the  $F_1$  stator rotated by  $\sim 20^\circ$ . However, in sharp contrast to the above AB process, the  $F_1$  stator angle never returned to the initial angle ( $\sim 0^\circ$ ) until the simulation ended ( $n = 5 - 7$ ) (Fig. 3f, right). At the end (the 5000th frame), the  $F_1$  stator was rotated by  $\sim 20^\circ$ . At this stage, the accumulated rotation in the  $c_{10}$ -ring was  $7 \times 36^\circ$ , counting from the A state, whereas the  $F_1$  motor made two progressive transitions rotating the chemical states by  $2 \times 120^\circ$ . The difference in the rotation angle,  $7 \times 36^\circ - 2 \times 120^\circ = 12^\circ$ , may be adsorbed by the counterclockwise rotation of the  $F_1$  stator.

Notably, the rotation of the  $F_1$  stator in the BC process is accompanied by a large distortion of the b-subunit (the right-end extrusion in Fig. 3f right), in which a part that is close to  $F_1$  is rotated counterclockwise, whereas a part of the b-subunit bound to the  $F_O$  a-subunit remains in the original position. The distortion of the b-subunit is a passive conformational change. Owing to this distortion, elastic energy is charged into the b-subunit. We propose that the presence of the b-subunit, in addition to the balance of rotation angles discussed later, is the reason why the BC process requires more c-subunits rotation than other processes (Supplementary Text 2). To quantify the motion of the b-subunit, we performed principal component analysis (PCA) on the b-subunit; the first principal component (PC1) in the AB process represents a counterclockwise tilt along the  $F_1$  stator (Fig. 3g, left). The time course of the PC1 value (the third panel in Fig. 3a) indicates that it changes closely in parallel with the  $F_1$  stator angle  $\theta$ . Note that a positive PC1 indicates a counterclockwise distortion of the b-subunit (the direction of the arrow in Fig. 3g).

Third, we examined the CA process of the 3-4-3 pathway. As shown in Fig. 3e panel, we observed a clockwise rotation of the  $F_1$  stator back to the initial angle. The b-subunit also followed clockwise tilting back to the relaxed structure in the A state (third panel in Fig. 3e). Therefore, it can

be said that the CA process resolves the distortion caused by the counterclockwise rotation accumulated in the AB and BC processes. Lastly, we also mentioned the rotation of  $F_1$  stator for the 4-3-3 pathway in [Supplementary Text 1](#).

## Relaxation simulations with the fixed $c_{10}$ -ring rotary angles

While these simulations provided dynamic view to resolve the symmetry mismatch, the obtained structures are inherently transient due to a relatively fast rotation of  $c_{10}$ -ring. To obtain well-equilibrated structures at every  $36^\circ$ - $c_{10}$ -ring-rotation steps, which were not seen by cryo-EM studies, we conducted further MD simulations of relaxation. We fixed the  $c_{10}$ -ring rotation step at  $n \times 36^\circ$ -rotation steps for  $n = 1 \sim 10$  and conducted further 2000-frame simulations ten times with the initial structure taken from the  $n \times 1000$ th frame snapshots in the previous trajectories.

We found a clear trend in the AB process. For  $n = 1$ , we started the simulations from the 1000th frame snapshot of the representative trajectory ([the red curve in Fig. 4a](#)), as well as from the trajectory in which the  $F_1$  rotated the least amount at the 1000th frame among ([the blue curve in Fig. 4a](#)). Both sets of simulations steadily showed counterclockwise rotations of the  $F_1$  stator with varying degrees of rotation angles up to  $\sim 30^\circ$  ([Fig. 4b, panel 1](#)). Thus, our simulation models gave consistent results with recent cryo-EM studies<sup>19</sup>. We also monitored the distortion of rotor  $c_{10}\gamma\epsilon$  ([Supplementary Fig. 3](#)). In the  $n = 2$  state, the  $F_1$  stator was rotated  $\sim 20^\circ$ , and then rotated clockwise to  $\sim -10^\circ$  in the c-ring state  $n = 3$ . Although the angle of the initial structure in  $n = 3$  had a much more counterclockwise rotated, we found its clockwise rotation back to  $\sim 0^\circ$  during the relaxation simulation ([the left-side green curve in Fig. 4a](#)). Thus, the clockwise return of the  $F_1$  stator at  $n = 3$  is a robust process.

In the BC process, we observed similar but not identical trends. In the  $c_{10}$ -ring state  $n = 4$ , the  $F_1$  stator rotated counterclockwise by  $\sim 20^\circ$ , which is very similar to the  $c_{10}$ -ring state  $n = 1$ . This angle was maintained in the c-ring states  $n = 5$  and 6. Particularly, in the  $n = 6$  state, we also observed marked, albeit incomplete, structural transitions in the  $F_1$  motor. [Supplementary Fig. 4](#)

shows that  $\alpha\beta 3$  exhibited irreversible and bottleneck transitions from the TP to E states in four of the ten trajectories. In the c-ring state  $n = 7$ , which is the final state in the BC process, the  $F_1$  stator is slightly, but not completely, turned to reach  $\sim +10^\circ$ . A simple estimation may help our understanding: the c-ring rotated by  $7 \times 36^\circ$  from the A state, while the  $F_1$  motor rotated by  $2 \times 120^\circ$ . The difference was  $12^\circ$ .

Finally, in the CA process, we found the result to be somewhat similar to that of the AB process (Fig. 4d 8-10). In the  $c_{10}$ -ring state  $n = 8$ , the  $F_1$  stator rotated counterclockwise by  $\sim 30^\circ$ , similar to the  $c_{10}$ -ring state  $n = 1$ . We found that the rotor was significantly distorted at  $n = 8$ , which is different from the  $n = 1$  case. The  $F_1$  stator slightly rotated back but remained rotated at  $\sim 10^\circ$  in the c-ring state  $n = 9$ . Finally, after the full round, the  $F_1$  stator settled down at the original  $0^\circ$ -angle. To check if the settled down was robustness, we simulated from another initial state in which the  $F_1$  stator rotated  $20^\circ$  (the right-side green curve in Fig. 4a). As we expected, we found the same settled down, therefore, we conclude that the  $F_1$  stator settles down to  $\sim 0^\circ$  when the system is fully relaxed after one round of the  $c_{10}$ -ring.

In summary, we see that the  $F_1$  stator constantly rotates back and forth, dragged by the  $c_{10}$ -ring rotation and by the chemical state change in  $F_1$ , but eventually returns to its initial position after the full round. We have discussed the angle change from a typical trajectory, and in the next section, we will discuss it using more statistical values.

## On the symmetry mismatch between $F_O$ and $F_1$

The stepwise rotations of the  $F_O$   $c_{10}$ -ring and  $F_1$  motor shown in Fig. 5a (upper panel) illustrate the symmetry mismatch. By symmetry, the ideal elementary rotation steps of the  $c_{10}$ -ring and  $F_1$  motor were  $36^\circ$  and  $120^\circ$ , respectively. We assume that the  $c_{10}$ -ring and the  $F_1$  motor rotation steps coincided at the ground state angle, the A state, chosen as the angle  $0^\circ$  (this is an approximation, but it turned out reasonable). Then, the  $120^\circ$ -step of the  $F_1$  motor was flanked by  $3 \times 36^\circ = 108^\circ$  and  $4 \times 36^\circ = 144^\circ$  of the  $c_{10}$ -ring steps with  $108^\circ$ -step closer. It is reasonable to assume that a smaller deviation in the angle corresponds to a lower energy of frustration. Thus, the  $3 \times 36^\circ = 108^\circ$  step of the  $c_{10}$ -ring may be

realized to accommodate the  $F_1$  motor  $120^\circ$ -state. In the same way, the  $240^\circ$ -step of the  $F_1$  motor was flanked by  $6 \times 36^\circ = 216^\circ$  and  $7 \times 36^\circ = 252^\circ$  of the  $c_{10}$ -ring steps with  $252^\circ$ -step closer. Obviously, the  $360^\circ$ -step was realized both by the c-ring and the  $F_1$  motor without frustration, which led to the 3-4-3 pathway, consistent with all three cryo-EM studies. This minimal-deviation-rule directly provides the simplest reasoning for the 3-4-3 pathway. The same rule may be applicable to c-rings composed of subunits other than ten (Fig. 5b). The  $c_8$ -ring, the  $c_9$ -ring, and the  $c_{11}$ -ring may exhibit the 3-2-3, 3-3-3, and 4-3-4 pathways starting from the ground state.

The next question is how to resolve the mismatch between the  $F_O$   $c_{10}$ -ring and the  $F_1$  motor in the primary rotation states B ( $n = 3$ ) and C ( $n = 7$ ) in the 3-4-3 pathway, namely the difference between  $120^\circ$  and  $108^\circ$  in the B state and the difference between  $240^\circ$  and  $252^\circ$  in the C state. Structures provided by Guo *et al.* suggested that the mismatch of the range  $\sim 12^\circ$  can mostly be compensated by the rotation of the  $F_1$  stator via the distortion of the b-subunit (Table 1, Fig. 5c, and Supplementary Text 3).

The mismatch between the  $F_O$   $c_{10}$ -ring and the  $F_1$  motor increases after the  $36^\circ$  c-ring rotation from the primary states A, B, and C, namely the rotation states  $n = 1, 4$ , and 8. This range of mismatches cannot be absorbed by the  $F_1$  stator rotation. Instead, it is realized by the combinations of the three types of elastic structural changes in the structures of Sobti *et al.* and Murphy *et al.* (Fig. 5c and Supplementary Text 3): a) the b-subunits accommodate  $\pm(7 - 14)^\circ$ , which appears as the rotation of the  $F_1$  stator, b) the  $c_{10}$ -ring rotation deviates  $\pm(11 - 13)^\circ$  from the ideal angles, and c) the rotor distortion is in the range of  $\pm(4 - 11)^\circ$ . In contrast, the  $F_1$  motor showed a fluctuation of only  $\sim \pm 2^\circ$ . It is a key feature that the  $F_1$  motor maintains the canonical angle with slight fluctuations in all cryo-EM structures. The corresponding angles monitored in our MD simulations are consistent with these experiments (Fig. 5a, the second and third panels), except that the MD simulations assumed uniform  $36^\circ$ -rotation steps of the  $c_{10}$ -ring, which is not rigorously the case in cryo-EM structures.

In all the AB, BC, and CA processes, the first  $36^\circ$ -c-ring-rotation step from the primary rotation states induces the counterclockwise rotation of the  $F_1$  stator ( $n = 1, 4, 8$ ). This is in agreement

with the findings of Murphy *et al.*<sup>19</sup>. The second 36°-c-ring-rotation step tends to keep the F<sub>1</sub> stator rotated, which is often accompanied by significant distortion of the rotor and incomplete transitions in the F<sub>1</sub> motor ( $n = 2, 5, 9$ ). The F<sub>1</sub> motor may take structures different from canonical three-fold rotary states. These are strongly frustrated states and are likely too dynamic to be modeled at high resolution in cryo-EM studies. The simulations showed relatively diverse configurations. Here, we suggest an interesting scenario: In some of these states, the F<sub>1</sub> motor may utilize the 80° sub-step to the so-called binding-dwell. Namely, the 80° sub-step of the F<sub>1</sub> motor is close to  $2 \times 36^\circ = 72^\circ$  step of c<sub>10</sub>-ring, the 200° sub-step is close to both  $5 \times 36^\circ = 180^\circ$  and  $6 \times 36^\circ = 216^\circ$  of c<sub>10</sub>-ring, and the 320° sub-step of the F<sub>1</sub> motor is close to  $9 \times 36^\circ = 324^\circ$  step of c<sub>10</sub>-ring, which may serve to relieve the highly frustrated energies. In the last 36°-c-ring-rotation step of the AB, BC, and CA processes, the F<sub>1</sub> stator finally rotates clockwise back to near the original angle ( $n = 3, 7, 10$ ); and the final angles differ in the three processes:  $\sim -10^\circ$ ,  $\sim +10^\circ$ , and  $\sim 0^\circ$  for the AB, BC, and CA processes, respectively.

## Conclusions

Using the recently obtained cryo-EM structures of the *Bacillus* PS3 F<sub>0</sub>F<sub>1</sub> ATP synthases, we carried out MD simulations of the holo-complex that mimicked three cycles of ATP synthesis, the AB, BC, and CA processes, and one round of rotor rotation. We found that the AB, BC, and CA processes completed the respective structural changes in F<sub>1</sub> with the highest probabilities when the c<sub>10</sub>-ring made three, four, and three 36°-rotation steps, which is consistent with the experimental results. At all ten 36°-step of c<sub>10</sub>-ring rotations, we investigated the holo-complex structural changes that resolve the symmetry mismatch between F<sub>0</sub> and F<sub>1</sub>. The symmetry mismatch was resolved by the distortion of a few parts. First, the b-subunit distortion led to the rotation of the F<sub>1</sub> stator back and forth relative to the F<sub>0</sub> stator. Second, the rotor itself is distorted to a lesser extent. Third, the comparative analysis of cryo-EM structures from the three species showed that the c-ring rotary angles can be deviated from symmetric ones. Since the movement of the β-subunit in αβ2 is suppressed by the b-subunit and ε-subunit, a stronger torque is required to overcome this barrier during the BC process. Simulation

results, together with the comparative analysis of recent cryo-EM structure models, reveal molecular reasoning to resolve the symmetry mismatch.

Since we adopted a simple approach to simulate rotary motions of the ATP synthase holo-complex, it has some limitations. First, since we used a classical MD with a coarse-grained molecular representation, the chemical reaction itself was only dealt with conformational changes correlated with chemical reactions. Second, since we adopted a predefined time course of  $c_{10}$ -ring rotation, we have not been able to reproduce the effects of stochastic proton transport. Third, since some parts of the b-subunit around  $\delta$ -subunit were missing in cryo-EM models, we cannot deny the possibility that this missing region contributes to the conformational change. Despite these limitations, our MD simulations revealed the mechanical coupling between  $F_1$  and  $F_O$  with reasonable accuracy in detail, which is sufficient to fully explain the solution of the symmetry mismatch in ATP synthases.

## Materials & Methods

### Model building

We used the *Bacillus* PS3 ATP synthase structure model for the A state (Protein Data Bank (PDB) ID, 6N2Y) obtained by cryo-EM as the reference structure for the corresponding A state in our MD simulations<sup>5</sup>. The model consists of eight proteins and 22 subunits,  $\text{ab}_2\text{c}_{10}\alpha_3\beta_3\gamma\delta\epsilon$ . Based on the PDB structure, we modeled loops for the missing regions in the a-subunit using MODELLER<sup>33</sup>. For the sake of structural symmetry, the range of residues used for three  $\alpha$ - and  $\beta$ -subunits was made the same: I8 to S501 for  $\alpha$ -subunits and T2 to M469 for  $\beta$ -subunits. In addition, one of the b-subunits (called b2 in the original PDB data) contains a C-terminal region that is neither modeled nor has a sequence assigned. This region was excluded from the simulation system. We established the coordinate system such that the center of masses of the  $\text{F}_\text{O}$   $\text{c}_{10}$ -ring was set at its original point, the rotation axis of the  $\text{c}_{10}$ -ring coincided with the z-axis, and R169 of the  $\text{F}_\text{O}$  a-subunit was on the x-axis.

We also prepared reference structure information for B and C states. Notably, we did not use the structural models given in the PDB for these states. Instead, we mostly used the structure information for the A state because we assumed that the A state was the ground-state form. In the structure-based simulation, the reference structure for each subunit was used to define the lowest energy state of the subunit, except for the structures of  $\alpha_3\beta_3$ . Assuming a change in the chemical state and the corresponding change in the stable conformation, we repositioned the reference structures in a rotary manner. For example, the reference structure information of  $\alpha\beta 1$  in the B state, which is in the DP state, was copied from the reference structure of  $\alpha\beta 3$  in the A state, having the same DP state. Similarly, all reference structure information could be obtained from those in the A state.

## MD simulation setting

We performed coarse-grained MD simulations using the reference structure described above. In the coarse-grained representation, one amino acid was treated as one particle located at the  $C\alpha$  position. We primarily used the energy function AICG2+<sup>34,35</sup>, which has been intensively used in simulations of large molecular complexes<sup>25,36,37</sup>. In this function, the reference structure was assumed to be the most stable conformation, and many parameters inside were determined from the atomic interactions in the all-atom reference structures (detail in [Supplementary Text 4](#)).

In this study, to investigate the mechanical coupling between  $F_O$  and  $F_1$  parts, we designed a minimal setup that mimicked ATP synthesis reactions induced by the c-ring rotation driven by the proton-motive-force in a simple design. Assuming the c-ring rotation driven by the proton-motive force, we made the c-ring rotate with a predefined time course. In the  $F_1$  part, for each  $\alpha\beta$  pair that sandwiches the ATP catalytic site, we set multiple basins that encode ATP-bound (TP), ADP-bound (DP), and empty (E) state conformations. When the state transition settled to the new state, we considered that the corresponding chemical event occurred (detail in [Supplementary Text 5](#)).

In our minimal design, the  $F_O$  a-subunit was a rigid part of the  $F_O$  stator and was fixed to the initial structure and position. The  $F_O$   $c_{10}$ -ring was treated as a rigid body and rotated by design around the z-axis with a predefined schedule.

With these setups, we ran simulations on several processes: AB, BC, and CA. First, in the AB process, the simulation started from the reference structure built from PDB ID: 6N2Y. In the simulation, the  $c_{10}$ -ring rotated stepwise  $36^\circ$  by  $36^\circ$  as designed. The coupling between  $F_O$  and  $F_1$  led the three double-basin systems of the  $F_1$ -motor to exhibit their conformations and reach the post-state (state B). Then, we selected a representative snapshot from the trajectory and treated it as the initial model for the subsequent simulation of the BC process. The simulation of the BC process began with this model. After three or four c-ring  $36^\circ$ -rotation steps, we also picked a representative snapshot of the initial structure of the CA process. Finally, we performed a CA simulation. In each simulation, we repeated 10 MD runs with different stochastic forces using CafeMol version 2.1<sup>38</sup>. Unless otherwise noted, we took  $4 \times 10^7$  MD steps,  $5 \times 10^7$  MD steps, and  $5 \times 10^7$  MD steps for the AB, BC, and CA



processes, respectively. We used underdamped Langevin dynamics at 323 K temperature and set the friction coefficient to 2.0 (CafeMol unit); default values were used for the others.

## Data Availability

The cryo-EM structures used in this paper are available download from the Protein Data Bank under PDB IDs 6N2Y, 6N2Z, and 6N30 for the *Bacillus* PS3 ATP synthase; 6WNQ, 6OQV, 6OQR, 6OQS, 6OQT, 6OQU, 6PQV, 6OQW, and 6WNR for the *E. coli* ATP synthase; 6RDH, 6RDW, 6RDZ, 6RE8, 6REB, and 6RES for the *Polytomella* sp. ATP synthase.

## Code Availability

All MD simulations in this paper was performed by CafeMol software. It can be downloaded from <https://www.cafemol.org>.

## References

- Boyer, P. D. The ATP synthase - A splendid molecular machine. *Annu. Rev. Biochem.* **66**, 717–749 (1997).
- Yoshida, M., Muneyuki, E. & Hisabori, T. ATP synthase - A marvellous rotary engine of the cell. *Nat. Rev. Mol. Cell Biol.* **2**, 669–677 (2001).
- Walker, J. E. The ATP synthase: The understood, the uncertain and the unknown. *Biochem. Soc. Trans.* **41**, 1–16 (2013).
- Abrahams, J. P., Leslie, A. G. W., Lutter, R. & Walker, J. E. Structure at 2.8 Å resolution of F1-ATPase from bovine heart mitochondria. *Nature* **370**, 621–628 (1994).
- Guo, H., Suzuki, T. & Rubinstein, J. L. Structure of a bacterial ATP synthase. *elife* **8**, 1–17 (2019).
- Noji, H., Yasuda, R., Yoshida, M. & Kinosita Jr., K. Direct observation of the rotation of F1-ATPase. *Nature* **386**, 299–302 (1997).
- Watt, I. N., Runswick, M. J., Montgomery, M. G., Walker, J. E. & Leslie, A. G. W. Bioenergetic cost of making an adenosine triphosphate molecule in animal mitochondria. *Proc. Natl. Acad. Sci.* **107**, 16823–16827 (2010).
- Stock, D., Leslie, A. G. W. & Walker, J. E. Molecular architecture of the rotary motor in ATP synthase. *Science* **286**, 1700–1705 (1999).

9. Mitome, N., Suzuki, T., Hayashi, S. & Yoshida, M. Thermophilic ATP synthase has a decamer c-ring: Indication of noninteger 10:3 H<sup>+</sup>/ATP ratio and permissive elastic coupling. *Proc. Natl. Acad. Sci.* **101**, 12159–12164 (2004).
10. Meier, T., Polzer, P., Diederichs, K., Welte, W. & Dimroth, P. Structure of the rotor ring of F<sub>1</sub>-type Na<sup>+</sup>-ATPase from *Ilyobacter tartaricus*. *Science*. **308**, 659–662 (2005).
11. Matthies, D. *et al.* The c13 ring from a thermoalkaliphilic ATP synthase reveals an extended diameter due to a special structural region. *J. Mol. Biol.* **388**, 611–618 (2009).
12. Vollmar, M., Schlieper, D., Winn, M., Büchner, C. & Groth, G. Structure of the c14 rotor ring of the proton translocating chloroplast ATP synthase. *J. Biol. Chem.* **284**, 18228–18235 (2009).
13. Pogoryelov, D., Yildiz, Ö., Faraldo-Gómez, J. D. & Meier, T. High-resolution structure of the rotor ring of a proton-dependent ATP synthase. *Nat. Struct. Mol. Biol.* **16**, 1068–1073 (2009).
14. Düser, M. G. *et al.* 36° step size of proton-driven c-ring rotation in F<sub>1</sub>o F<sub>1</sub>-ATP synthase. *EMBO J.* **28**, 2689–2696 (2009).
15. Sielaff, H., Yanagisawa, S., Frasch, W. D., Junge, W. & Börsch, M. Structural asymmetry and kinetic limping of single rotary F-ATP synthases. *Molecules* **24**, 24–29 (2019).
16. Pänke, O. & Rumberg, B. Kinetic modeling of rotary CF<sub>0</sub>F<sub>1</sub>-ATP synthase: Storage of elastic energy during energy transduction. *Biochim. Biophys. Acta* **1412**, 118–128 (1999).
17. Cherepanov, D. A., Mulkidjanian, A. Y. & Junge, W. Transient accumulation of elastic energy in proton translocating ATP synthase. *FEBS Lett.* **449**, 1–6 (1999).
18. Okazaki, K. & Hummer, G. Elasticity, friction, and pathway of  $\gamma$ -subunit rotation in F<sub>1</sub>o F<sub>1</sub> - ATP synthase. *Proc. Natl. Acad. Sci.* **112**, 10720–10725 (2015).
19. Murphy, B. J. *et al.* Rotary substates of mitochondrial ATP synthase reveal the basis of flexible F<sub>1</sub>-F<sub>o</sub> coupling. *Science*. **364**, (2019).
20. Stewart, A. G., Lee, L. K., Donohoe, M., Chaston, J. J. & Stock, D. The dynamic stator stalk of rotary ATPases. *Nat. Commun.* **3**, (2012).
21. Sobti, M. *et al.* Cryo-EM structures provide insight into how E. coli F<sub>1</sub>F<sub>o</sub> ATP synthase accommodates symmetry mismatch. *Nat. Commun.* **11**, (2020).
22. Mukherjee, S. & Warshel, A. Electrostatic origin of the mechanochemical rotary mechanism and the catalytic dwell of F<sub>1</sub>-ATPase. *Proc. Natl. Acad. Sci. U. S. A.* **108**, 20550–20555 (2011).
23. Bai, C., Asadi, M. & Warshel, A. The catalytic dwell in ATPases is not crucial for movement against applied torque. *Nat. Chem.* **12**, 1187–1192 (2020).
24. Pu, J. & Karplus, M. How subunit coupling produces the  $\gamma$ -subunit rotary motion in F<sub>1</sub>-ATPase. *Proc. Natl. Acad. Sci. U. S. A.* **105**, 1192–1197 (2008).
25. Kubo, S., Niina, T. & Takada, S. Molecular dynamics simulation of proton-transfer coupled rotations in ATP synthase FO motor. *Sci. Rep.* **10**, 8225 (2020).
26. Pogoryelov, D. *et al.* Microscopic rotary mechanism of ion translocation in the F(o) complex of ATP synthases. *Nat. Chem. Biol.* **6**, 891–899 (2010).
27. Hayashi, S. *et al.* Molecular mechanism of ATP hydrolysis in F<sub>1</sub>-ATPase revealed by molecular simulations and single-molecule observations. *J. Am. Chem. Soc.* **134**, 8447–8454 (2012).
28. Dittrich, M., Hayashi, S. & Schulten, K. On the mechanism of ATP hydrolysis in F<sub>1</sub>-ATPase. *Biophys. J.* **85**, 2253–2266 (2003).
29. Okazaki, K., Koga, N., Takada, S., Onuchic, J. N. & Wolynes, P. G. Multiple-basin energy landscapes for large-amplitude conformational motions of proteins: Structure-based molecular dynamics simulations. *Proc. Natl. Acad. Sci. U. S. A.* **103**, 11844–11849 (2006).
30. Best, R. B., Chen, Y. G. & Hummer, G. Slow protein conformational dynamics from multiple experimental structures: The helix/sheet transition of Arc repressor. *Structure* **13**, 1755–1763 (2005).
31. Maragakis, P. & Karplus, M. Large amplitude conformational change in proteins explored with a plastic network model: Adenylate kinase. *J. Mol. Biol.* **352**, 807–822 (2005).
32. Boyer, P. D. The binding change mechanism for ATP synthase - Some probabilities and possibilities. *Biochim. Biophys. Acta* **1140**, 215–250 (1993).

33. Šali, A. & Blundell, T. L. Comparative protein modelling by satisfaction of spatial restraints. *J. Mol. Biol.* **234**, 779–815 (1993).
34. Li, W., Terakawa, T., Wang, W. & Takada, S. Energy landscape and multiroute folding of topologically complex proteins adenylate kinase and 2ouf-knot. *Proc. Natl. Acad. Sci.* **109**, 17789–17794 (2012).
35. Li, W., Wang, W. & Takada, S. Energy landscape views for interplays among folding, binding, and allostery of calmodulin domains. *Proc. Natl. Acad. Sci. U. S. A.* **111**, 10550–10555 (2014).
36. Takada, S. *et al.* Modeling structural dynamics of biomolecular complexes by coarse-grained molecular simulations. *Acc. Chem. Res.* **48**, 3026–3035 (2015).
37. Kubo, S., Li, W. & Takada, S. Allosteric conformational change cascade in cytoplasmic dynein revealed by structure-based molecular simulations. *PLoS Comput. Biol.* **13**, 8502 (2017).
38. Kenzaki, H. *et al.* CafeMol: A coarse-grained biomolecular simulator for simulating proteins at work. *J. Chem. Theory Comput.* **7**, 1979–1989 (2011).

487

## 488 Acknowledgements

489 S.K. was supported by JSPS Research Fellowship. This work was also supported by the MEXT grant  
490 JPMXP1020200101 as "Program for Promoting Researches on the Supercomputer Fugaku" (ST),  
491 partly by JSPS KAKENHI grants 20H0593 (ST) and 21H02441 (ST), and by by the Japan Science  
492 and Technology Agency (JST) grant JPMJCR1762 (ST).

493

## 494 Author Contributions

495 S.K. and S.T. conceived and designed the project; T.N. developed the simulation code; S.K.  
496 performed the simulations; S.K. and T.N. analyzed the data; S.K. assembled figures, and all authors  
497 discussed the results and were involved in the manuscript writing process.

498

## 499 Competing Interests statement

500 The authors declare no competing interests.

501

502

503

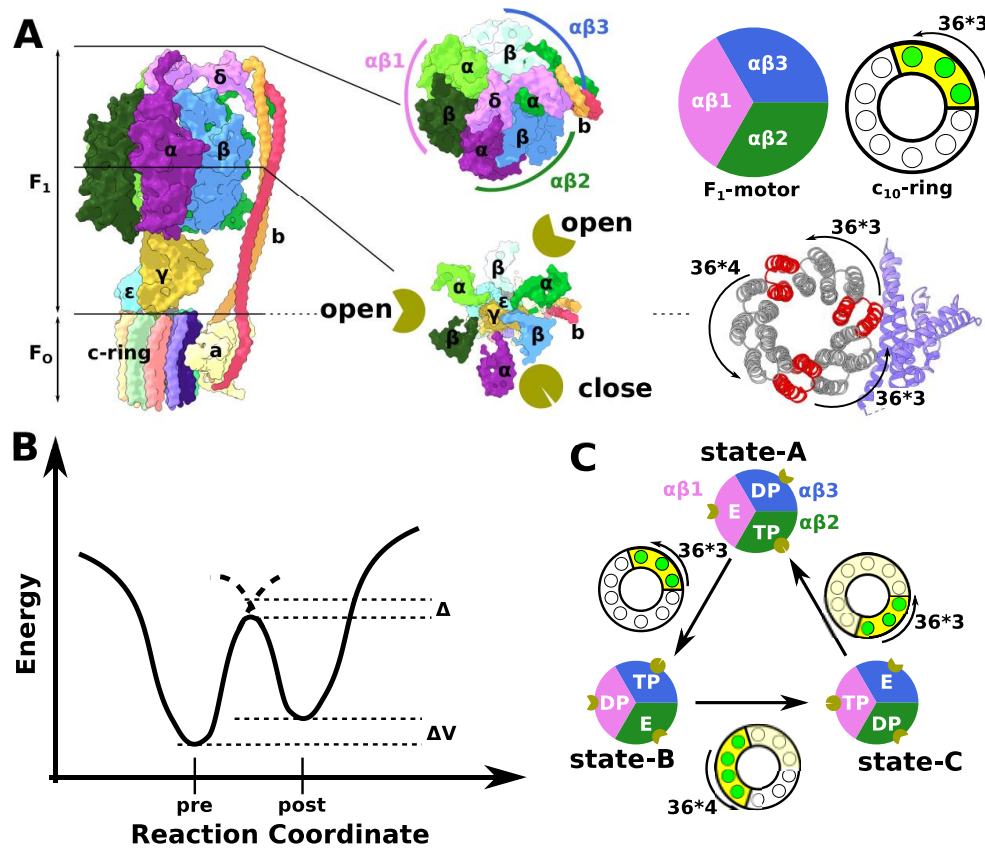

**Fig. 1 Structure of  $F_0F_1$  ATP synthase and the simulation system.**

a. (Leftmost) The structure of *Bacillus* PS3  $F_0F_1$  ATP synthase holo-complex (the A state, PDB ID: 6N2Y). The  $F_1$  motor (top half) contains  $\delta$ : pink;  $\alpha_3\beta_3$  hexamer made of three  $\alpha\beta$  pairs,  $\alpha\beta1$ : lime green and green;  $\alpha\beta2$ : violet and sky blue;  $\alpha\beta3$ : yellow green and white;  $\gamma$ : dark yellow;  $\epsilon$ : cyan. The  $F_0$  motor contains  $c_{10}$ -ring: pastel-colored barrel-shaped objects;  $a$ -subunit: pale yellow;  $b$ -subunits: pale red and orange. In the 6N2Y structure,  $\alpha\beta1$ ,  $\alpha\beta2$ , and  $\alpha\beta3$  take the E, TP, and DP states, respectively, and these take the open, closed, and open structures, respectively indicated by golden pie chart pictures. (Right) Guo *et al.* built three different ATP synthase conformations: A (PDB ID: 6N2Y), B (6N2Z), and C (6N30). The structure differences from A to B (AB), B to C (BC), and C to A (CA) contain three, four, and three 36°- $c_{10}$ -ring-positional-rotation in a counterclockwise direction, respectively. The red  $c$ -subunits indicate the ones closest to the  $a$ -subunit in the A, B, and C states. b. The schematic view of the double-basin model. "pre" and "post" indicate the minimum energy structures for the pre- and post-structures, respectively.  $\Delta$  and  $\Delta V$  are parameters to control the barrier

height and relative stability between two minima. **c.** The conformational change cycle in the ATP synthesis mode.

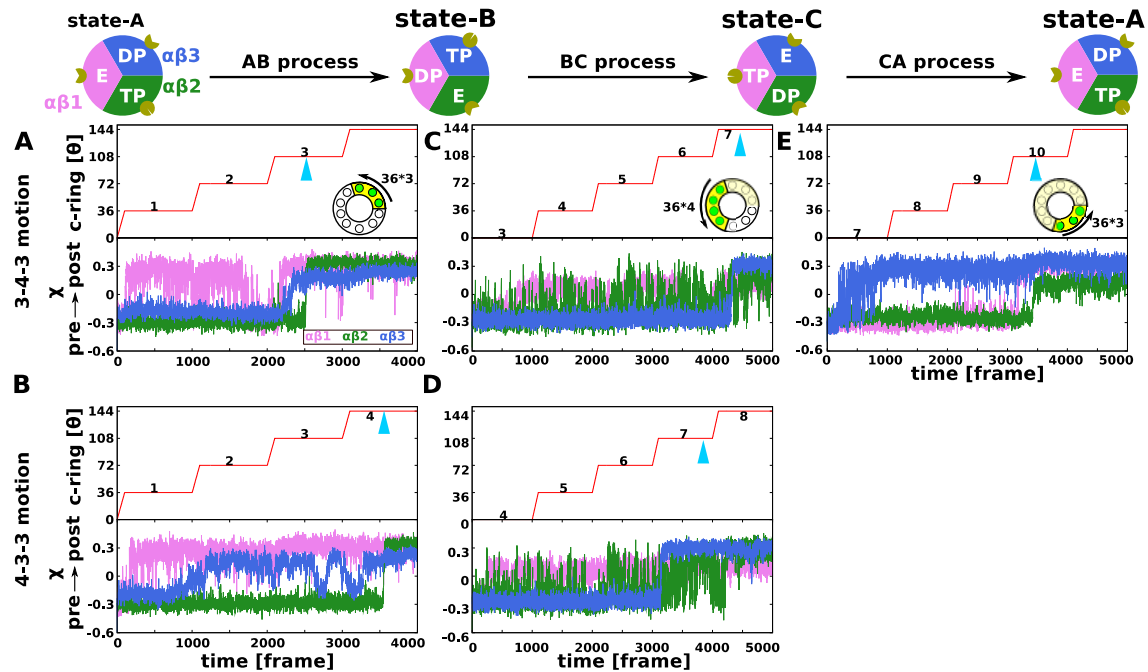

**Fig. 2 Structure change in the F<sub>1</sub> motor during MD simulations of one round c<sub>10</sub>-ring rotations.**

**a-e.** Representative MD simulation trajectories for the AB (panel A), BC (panel C), and CA (panel E) processes in the 3-4-3 pathway, and for the AB (panel B) and BC (panel D) processes in the 4-3-3 pathway. Results of all the 10 trajectories are given in **Supplementary Fig. 1**. Each panel shows the  $c_{10}$ -ring rotation time schedule (upper) and the reaction coordinate for the structure changes:  $\chi$  of the  $\alpha\beta 1$ ,  $\alpha\beta 2$ , and  $\alpha\beta 3$  (red, green, and blue, respectively) (bottom). The triangle mark colored cyan shows the timing when all the three  $\alpha\beta$ 's completed their structural changes. The CA process trajectories in the 4-3-3 motion is shown in **Supplementary Fig. 2**. One frame of time corresponds to  $10^4$  MD steps.

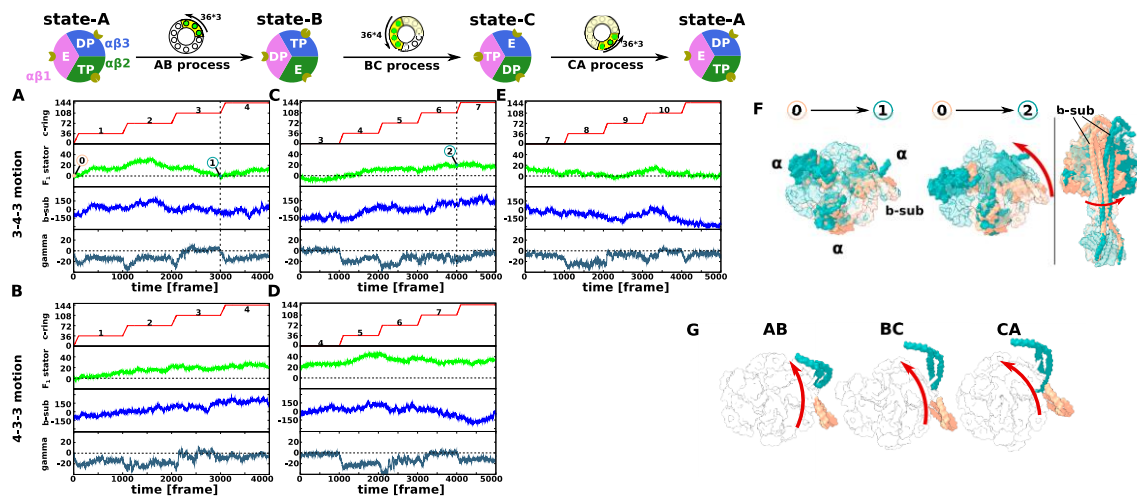

**Fig. 3  $F_0$ - $F_1$  coupling during MD simulations of one round  $c_{10}$ -ring rotations.**

**a-e.** Each panel plots, from the top to bottom, the rotation angle of the  $c_{10}$ -ring, the rotation angle of the  $F_1$  stator, the first principal component about the b-subunit motions, and the rotation angle of the rotor defined by the angle of the upper part of  $\gamma$ -subunit relative to the rotation angle of  $c_{10}$ -ring (the moving average over 10 frames) for the same trajectories as those shown in Fig. 2a-e. **f.** Superimposed snapshots shown in Fig. 3a-c trajectories 0, 1, and 2, respectively. The snapshot at time point 0 is colored dark salmon, and those at time point 1 and 2 are colored dark cyan. The three  $\alpha$ -subunits are opaque to make it easier to see, and the others are translucent. **g.** The direction of structural change of the first principal component in the principal component analysis for the b-subunit. The first principal component value increases from dark salmon to dark cyan.

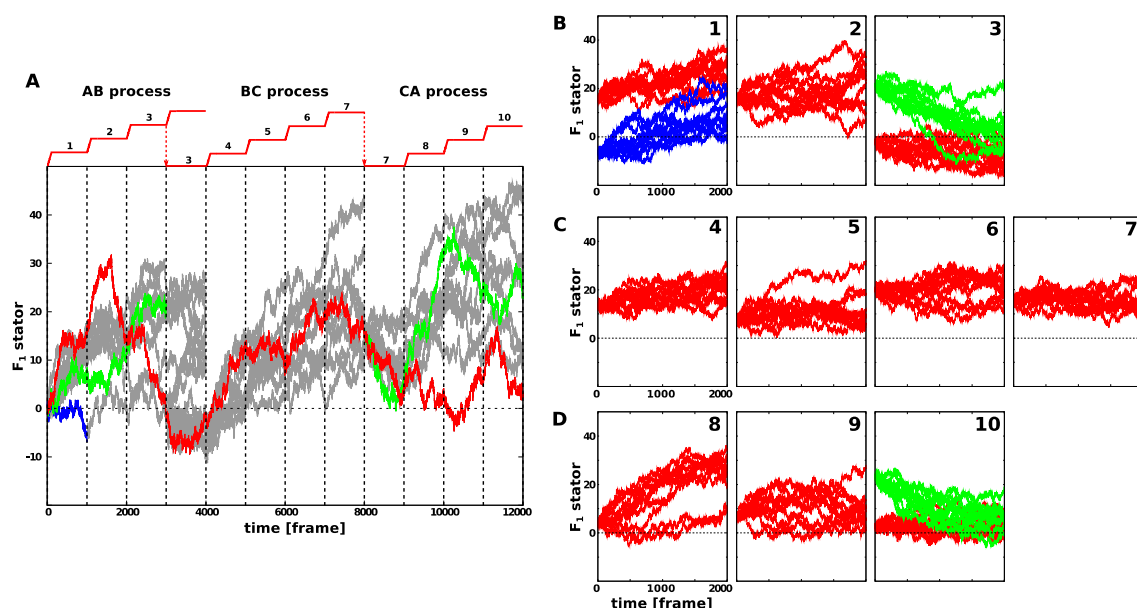



# **Fig. 4 Relaxation simulation with the $c_{10}$ -ring rotation angle fixed at every $n \times 36^\circ$ step.**

**a.** Reference trajectories from which relaxation simulations were conducted. The  $F_1$  stator rotation angle is depicted. Red: the representative one plotted in Figs. 2 and 3. Green in 0-3000th frame: one that was rotated markedly at the 3000th frame. Green in 8000-12000th frame: a case where the  $F_1$  stator was largely rotated at the end. Blue: a case where the  $F_1$  stator was least rotated. Gray: all the other trajectories. **b-d.** Each panel plots the time course of the  $F_1$  stator angle in the relaxation simulation with  $c_{10}$ -ring fixed to the  $n \times 36^\circ$  rotation angle. Each simulation started from the snapshot of the reference trajectory in **a** at the corresponding time. **b.** the  $c_{10}$ -ring rotation state  $n = 1, 2$ , and 3 in the AB process. **c.**  $n = 4, 5, 6$ , and 7 in the BC process. **d.**  $n = 8, 9$ , and 10 in the CA process.

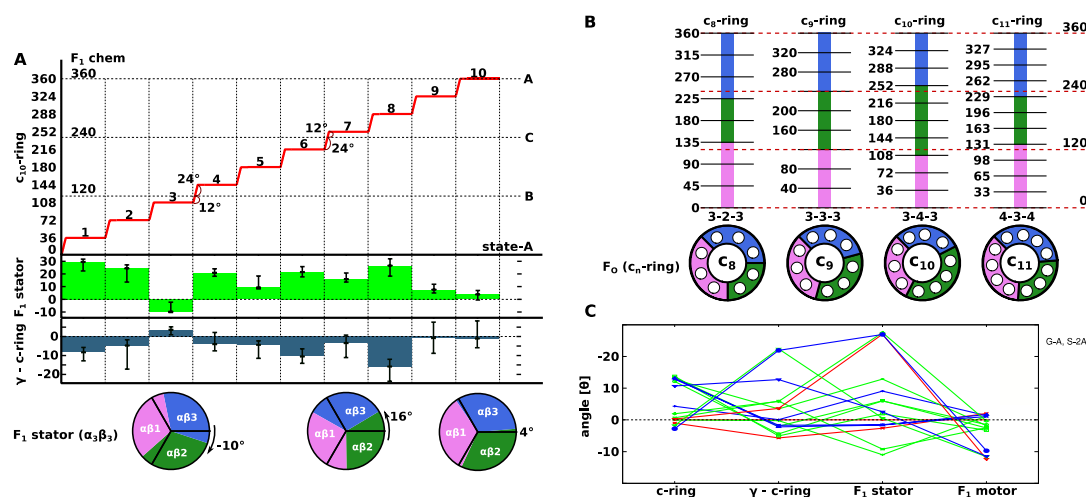

# **Fig. 5 The $F_0$ - $F_1$ coupling and the symmetry mismatch in ATP synthesis process.**

**a.** Summary of the symmetry mismatch and the elastic structure changes. The stepwise  $c_{10}$ -ring rotation (the red ladder), the  $F_1$  motor rotation (the horizontal dashed line), the  $F_1$  stator rotation via the distortion of the b-subunit (the green bar in the second panel), and the rotor distortion (the blue bar in the third panel) are depicted for every  $n \times 36^\circ$   $c_{10}$ -ring rotation step. **b.** Predicted rotation pathways are described for systems with different number of c-subunits. **c.** Four elements of structure distortions found in cryo-EM studies. c-ring, the deviation of the c-ring rotation angle from its ideal angle.  $\gamma$ -c-ring, the rotary angle of the  $\gamma$ -subunit at its interaction site to  $\alpha\beta$  minus the c-ring rotation



564 angle.  $F_1$  stator, the  $F_1$  stator rotation angle relative to the  $F_O$  stator.  $F_1$  motor, the rotation of the  $\gamma$ -  
 565 subunit relative to the  $F_1$  stator  $\alpha_3\beta_3$ .  
 566

**Table 1 Rotary angles in cryo-EM structures of three ATP synthases.**

| Guo                        | c <sub>10</sub> -ring | n <sup>1)</sup> | $\gamma - c_{10}\text{-ring}^{2)}$ | F <sub>1</sub> stator <sup>3)</sup> | F <sub>1</sub> motor <sup>4)</sup> | m <sup>5)</sup> |
|----------------------------|-----------------------|-----------------|------------------------------------|-------------------------------------|------------------------------------|-----------------|
| 6N2Y (state-A)             | 0                     | 0/10            | 0                                  | 0                                   | 0                                  | 0/3             |
| 6N2Z (state-B)             | 108.0(-0.0)           | 3               | -0.2                               | -11.0                               | 118.8 (1.2)                        | 1               |
| 6N30 (state-C)             | 247.7(4.3)            | 7               | 0.1                                | 9.1                                 | 238.7 (1.3)                        | 2               |
| Sobti                      |                       |                 |                                    |                                     |                                    |                 |
| 6WNQ (2A) A <sup>Guo</sup> | 0                     | 0/10            | 0                                  | 0                                   | 0                                  | 0/3             |
| 6OQV (2B)                  | -1.0(-1.0)            | 0/10            | -5.7                               | -2.6                                | -2.0 (2.0)                         | 0/3             |
| 6OQR (1A) B <sup>Guo</sup> | 107.3 (0.7)           | 3               | 6.0                                | -9.2                                | 122.5 (-2.5)                       | 1               |
| 6OQS (1B)                  | 130.3 (13.7)          | 4               | -5.1                               | 1.9                                 | 123.3 (-3.3)                       | 1               |
| 6OQT (1C)                  | 130.6 (13.4)          | 4               | -2.0                               | 6.0                                 | 122.5 (-2.5)                       | 1               |
| 6OQU (1D)                  | 131.9 (12.1)          | 4               | -4.4                               | 6.0                                 | 121.5 (-1.5)                       | 1               |
| 6PQV (1E)                  | 131.2 (12.8)          | 4               | 3.5                                | 12.9                                | 121.8 (-1.8)                       | 1               |
| 6OQW (3A) C <sup>Guo</sup> | 239.1 (12.98)         | 7               | -1.7                               | -1.5                                | 238.9 (1.1)                        | 2               |
| 6WNR(3B)                   | 238.8 (13.2)          | 7               | -2.2                               | -1.7                                | 238.3 (1.7)                        | 2               |
| Murphy                     |                       |                 |                                    |                                     |                                    |                 |
| 6RDH(1A) A <sup>Guo</sup>  | 0                     | 0/10            | 0                                  | 0                                   | 0                                  | 0/3             |
| 6RDW(1F)                   | 35.7 (0.3)            | 1               | 3.6                                | 27.1                                | 12.3 (-12.3)                       | 0/3             |
| 6RDZ(2A) B <sup>Guo</sup>  | 109.8 (-1.8)          | 3               | 22.4                               | 0.6                                 | 131.6 (-11.6)                      | 1               |
| 6RE8(2D)                   | 142.1 (1.9)           | 4               | 5.8                                | 27.5                                | 120.4 (-0.4)                       | 1               |
| 6REB(3A) C <sup>Guo</sup>  | 241.3 (10.7)          | 7               | 12.7                               | 2.6                                 | 251.5 (-11.5)                      | 2               |
| 6RES(3C)                   | 254.8 (-2.8)          | 7               | 21.9                               | 26.9                                | 249.7 (-9.7)                       | 2               |

The angle value is in degrees. The value in parentheses is the deviation from the ideal value from its symmetry.

<sup>1)</sup> The c<sub>10</sub>-ring rotation step. <sup>2)</sup> The distortion of the rotor is defined by the difference between the angle of the upper part of the  $\gamma$ -subunit and the rotation angle of the c-ring. <sup>3)</sup> The rotation angle of the F<sub>1</sub> stator relative to the F<sub>0</sub> stator. <sup>4)</sup> The difference between the angles of the F<sub>1</sub> stator and F<sub>1</sub> rotor. <sup>5)</sup> F<sub>1</sub> motor rotation step.
