1 **F<sub>O</sub>-F<sub>1</sub> coupling and symmetry mismatch in ATP synthase**  
2 **resolved in every F<sub>O</sub> rotation step**

3

4 **Shintaroh Kubo<sup>1,2,\*</sup>, Toru Niina<sup>1</sup>, & Shoji Takada<sup>1,\*</sup>**

5

6 <sup>1</sup> Department of Biophysics, Graduate School of Science, Kyoto University, Kyoto 606-8502,

7 Japan

8 <sup>2</sup> Department of Anatomy and Cell Biology, McGill University, Montréal, Québec H3A 0C7,

9 Canada

10

11 \* Corresponding author:

12 Shintaroh Kubo, Department of Anatomy and Cell Biology, McGill University, Montréal,

13 Québec H3A 0C7, Canada. e-mail: [shintaroh.kubo@mail.mcgill.ca](mailto:shintaroh.kubo@mail.mcgill.ca)

14

15 Shoji Takada, Department of Biophysics, Graduate School of Science, Kyoto University,

16 Kyoto 606-8502, Japan e-mail: [takada@biophys.kyoto-u.ac.jp](mailto:takada@biophys.kyoto-u.ac.jp)

17

18 **Abstract**

19 The  $F_0F_1$  ATP synthase, essential for cellular energy production, is composed of the  $F_0$  and  $F_1$  rotary  
20 motors. While both  $F_0$  and  $F_1$  have pseudo-symmetric structures, their symmetries do not match. How  
21 the symmetry mismatch is solved remains elusive due to missing intermediate structures of rotational  
22 steps. Here, for ATP synthases with 3- and 10-fold symmetries in  $F_1$  and  $F_0$ , respectively, we  
23 uncovered the mechanical couplings between  $F_0$  and  $F_1$  at every  $36^\circ$  rotation step via molecular  
24 dynamics simulations and comparison of cryo-electron microscopy structures from three species. We  
25 found that the frustration is shared by several elements. The  $F_1$  stator partially rotates relative to the  
26  $F_0$  stator via elastic distortion of the b-subunits. The rotor can be distorted. The c-ring rotary angles  
27 can be deviated from symmetric ones. **Additionally, the  $F_1$  motor may take non-canonical structures**  
28 **relieving stronger frustration.** Together, we provide comprehensive understanding to solve the  
29 symmetry mismatch.

30

31 **Key words:**  $F_0F_1$  ATP synthase, Molecular motor, Molecular dynamics simulation

32

## 33 Introduction

34 Adenosine triphosphate (ATP) is mainly synthesized by the enzyme  $F_0F_1$  ATP synthase<sup>1-3</sup>. The  
35 enzyme is composed of two rotary motors, the  $F_0$  and  $F_1$  motor, and these motors are connected by  
36 two stalks, a central rotor and a peripheral stalk (Fig. 1a). The membrane-embedded  $F_0$  motor rotation  
37 driven by the proton motive force causes the central rotor rotation. The latter induces a series of  
38 conformational changes in the  $F_1$  motor, where ATP is synthesized from adenosine diphosphate  
39 (ADP) and inorganic phosphate (Pi). The  $F_0F_1$  ATP synthase is also known as a reversible machine,  
40 which can hydrolyze ATP to pump protons against the proton motive force.

41 The  $F_1$  motor contains the central rotor ( $\gamma/\epsilon$ -subunit in bacterial  $F_1$ ) and an  $\alpha_3\beta_3$  hexamer made  
42 of three  $\alpha\beta$  dimers (Fig. 1a). Each  $\alpha\beta$  dimer has catalytic sites for the ATP synthesis reaction and take  
43 three distinct chemical states and conformations<sup>4</sup>, which are conventionally denoted as the ATP-  
44 bound state (TP for brevity), the ADP-bound state (DP), and the empty state (E). Especially, the  $\beta$ -  
45 subunit takes markedly different conformations among the three states; for the case of the *Bacillus*  
46 PS3 ATP synthase, which will be our target in this study, its C-terminal segment takes a “closed”  
47 conformation in the TP state, while it takes an “open” conformation in the DP and the E states<sup>5</sup>. Since  
48 a single-molecule measurement showed that the  $F_1$  motor in the ATP hydrolysis mode uncovered  
49 120°-stepwise rotation of the central rotor, accompanied by progress of the chemical states in  $\alpha_3\beta_3$ <sup>6</sup>.  
50 Thus, coupled with the nucleotide-dependent conformational change in the  $\alpha/\beta$ -subunits, one round of  
51 the  $F_1$  motor results in the hydrolysis or synthesis of three ATP molecules, depending on the central  
52 rotor direction. The  $F_0$  motor is made of an a-subunit and a c-ring, which is a ring-shaped c-subunit  
53 oligomer working as a rotor (Fig. 1a). The number of c-subunits in the c-ring varies between 8-17  
54 depending on the species<sup>7-13</sup>; 10 subunits in the *Bacillus* PS3 ATP synthase. Each c-subunit has one  
55 key proton-relaying residue. Single-molecule experiments for *Escherichia coli* ATP synthase (10  
56 subunits) identified 36° stepwise c-ring rotations<sup>14</sup>. Thus, one round of the  $F_0$  motor was driven by the  
57 transfer of the same number of protons as that of c-subunits.

58 In contrast to the mechanisms of each motor, the mechanism of the coupling between the  $F_0$   
59 and  $F_1$  motors is less clear. Because the number of c-subunits in the c-ring is not a multiple of three in

60 most cases, the mean number of protons necessary for the synthesis of one ATP is not an integer  
61 value, which is sometimes called a symmetry mismatch. There has been much debate regarding the  
62 mechanism by which  $F_0F_1$  ATP synthase resolves this mismatch<sup>15</sup>. For *Bacillus* PS3 ATP synthases,  
63 the two motors are connected via a central rotor made of  $c_{10}\gamma\epsilon$  and a peripheral stalk made of  $b_2\delta$  (Fig.  
64 1a). Some early studies suggested the elastic distortion of the central rotor,  $\gamma$ -subunit<sup>16-18</sup>. Other  
65 studies have anticipated the role of  $\delta$ <sup>19</sup>. Recent cryo-EM structures of mitochondria and *Bacillus* PS3  
66 ATP synthases point to distortion in b-subunits<sup>5,20</sup>. From recent cryo-EM studies, the symmetric  
67 mismatch and the relatively rigid rotor together imply that the  $\alpha_3\beta_3$  hexamer rotate relative to the a-  
68 subunit<sup>19,21</sup>. Sobti *et al.* resolved three different rotational states and one sub-state in *E. coli* ATP  
69 synthase. The sub-state structure essentially had the same  $F_1$  configuration as one of the three state  
70 structures, but the  $c_{10}$ -ring together with the  $F_1$  stator,  $c_{10}\alpha_3\beta_3\gamma\epsilon$ , rotated relative to the  $F_0$  stator.  
71 Comparing individual conformations, we see that the b-subunits have significantly different  
72 conformations. Therefore, the existence of the sub-state and the flexibility of the b-subunit may be  
73 necessary for resolving the symmetry mismatch. Notably, however, the cryo-EM models in Sobti *et*  
74 *al.* include structural models for four  $c_{10}$ -ring rotation states out of ten possible rotational states.  
75 Perhaps other states are more fragile and/or more short-lived, so that high-resolution models could not  
76 be built. Moreover, cryo-EM models provide static snapshots, as usual; for example, how the sub-  
77 state arises, how the b-subunit distortion resolves the mismatch, and when and how the  $F_1$ -motor  
78 undergoes structural changes in response to the c-ring rotation remain unclear.

79 In this study, to address the  $F_0$ - $F_1$  coupling and the molecular mechanisms to solve the  
80 symmetry mismatch, we performed molecular dynamics (MD) simulations that mimic the ATP  
81 synthesis dynamics for one round of rotation in the holo-complex of the *Bacillus*  $F_0F_1$  ATP synthesis.  
82 While many molecular simulations have been reported so far for each of the  $F_0$  and  $F_1$  motors<sup>18,22-28</sup>,  
83 to the best of our knowledge, this study provides MD simulations for the first time for one round of  
84 ATP synthase holo-complex. Our dynamic simulations showed the order and timing of the structural  
85 changes in the three  $\alpha\beta$ -pairs in the  $F_1$  motor during ten  $36^\circ$ -rotation steps of the  $F_0$  motor.  
86 Furthermore, relaxation simulations with a fixed c-ring rotation angle in every  $36^\circ$ -step exhibited the  
87 c-ring-dependent partial rotation of the  $F_1$  stator relative to the  $F_0$  stator and some twists in the rotor.

88 Then, motivated by the simulation results, we conducted a comparative analysis of cryo-EM  
89 structures from three species, accounting for the structural changes in the ATP synthases. Together,  
90 we reveal how to solve the symmetry mismatch in F<sub>0</sub>F<sub>1</sub> ATP synthesis in unprecedented detail.

91

## 92 Results and Discussion

### 93 Simulating the rotation dynamics in the ATP synthase holo-complex

94 The *Bacillus* PS3 ATP synthase cryo-EM study provides holo-complex structure models in the three  
95 rotational states: A (PDB ID: 6N2Y, Fig. 1a left), B (PDB ID: 6N2Z), and C (PDB ID: 6N30)<sup>5</sup>. In all  
96 of these holo-complex models, F<sub>1</sub> was in the catalytic dwell. We introduce the numbering of the three  
97 αβ pairs, αβ1, αβ2, and αβ3, counterclockwise starting from the α/β-subunits furthest from the b-  
98 subunit (Fig. 1a, middle). In the A state, αβ1, αβ2, and αβ3 are in the E, TP, and DP states,  
99 respectively. The structural change from A to B (the AB process) involves the counterclockwise  
100 rotation of c<sub>10</sub>-ring by 3×36°, together with the progress of the chemical steps in the three αβ pairs;  
101 αβ1, αβ2, and αβ3 change to the DP, E, and TP states, respectively. Similarly, the transitions from B  
102 to C (the BC process) and from C to A (the CA process) involve rotations by four and three 36° c-ring  
103 rotation steps, respectively, coupled with the chemical state changes in αβ pairs. We call this whole  
104 process the 3-4-3 pathway, assuming that the entire process starts and ends in the A state.

105 Given the 3-4-3 pathway in the three cryo-EM rotational states, we envisioned to simulate the  
106 process that the F<sub>1</sub> motor in the A state would reach the B state when the F<sub>0</sub> c<sub>10</sub>-ring rotates  
107 counterclockwise by 3×36°. To simulate the conformational change in the AB process, we need to  
108 model in a way that each αβ pair can accommodate both A and B state conformations. For this  
109 purpose, we employed a double-basin model that encodes A and B state conformations separately for  
110 each αβ system (see Methods for details). The double-basin model concisely builds two distinct  
111 conformational basins controlling both the energy barrier in between and the relative stabilities of the  
112 two basins<sup>29-31</sup> (Fig. 1b). Also, for the BC and CA processes, introducing the double-basin models that

113 connect the B and C states and that connect the C and A states, we expected to observe the respective  
114 state transitions in the  $F_1$  motor while the  $c_{10}$ -ring rotates  $4 \times 36^\circ$  and  $3 \times 36^\circ$  degrees, respectively (Fig.  
115 1c). To ensure the energetics of the ATP synthesis process, we set the summation of the relative  
116 stabilities of the three  $\alpha\beta$  double-basin models in the AB, BC, and CA processes to  $\sim +36$  kcal, which  
117 approximates the free energy increase for the synthesis of 3 ATP molecules from ADP and Pi.

118 In the simulations, we rotated the  $c_{10}$ -ring by  $36^\circ$  with a constant angular velocity over  $10^6$   
119 MD steps, followed by a  $c_{10}$ -ring pause for  $9 \times 10^6$  MD steps. Note that  $10^4$  MD steps were denoted as  
120 one frame. For each case, we repeated the same simulations ten times with different stochastic forces.  
121 The structural transitions in each  $\alpha\beta$  are monitored by its reaction coordinate  $\chi$ , which takes negative  
122 and positive values when  $\alpha\beta$  is in the pre- and post- states in the double-basin system, respectively.  
123 For the AB process, we repeated this rotation step four times (the upper c-ring panel of Fig. 2ab). For  
124 the BC and CA processes, we began with  $10 \times 10^6$  MD equilibration steps in the initial  $c_{10}$ -ring angle  
125 and then repeated the rotation step four times (the upper c-ring panel of Fig. 2cd and Fig. 2e,  
126 respectively).

127 How many  $F_0$  c-ring rotation steps are necessary to induce the  $F_1$   
128 nucleotide state transition?

129 We monitored the structural changes in each  $\alpha\beta$  (Fig. 2,  $\chi$  pre  $\rightarrow$  post) as well as other structures.  
130 When all three  $\chi$ 's in  $F_1$  changed from negative to positive values, we regarded  $F_1$  to have completed  
131 its transition. Fig. 2a shows a representative trajectory of the AB process: (1) The  $\alpha\beta 1$  started  
132 transitions from the E state to the DP state at the  $\sim 100$ th frame immediately after the c-ring rotated  
133  $36^\circ$ , followed by rapid transitions back and forth. (2) The  $\alpha\beta 3$  made a transition from the DP to the TP  
134 state at the  $\sim 2200$ th frame when the c-ring completed the third  $36^\circ$  rotation. (3) Finally,  $\alpha\beta 2$  transitioned  
135 from the TP to the E state at the  $\sim 2500$ th frame, corresponding to the dissociation of a synthesized  
136 ATP molecule. At this stage, all three  $\alpha\beta$  pairs completed their transitions (blue triangle in the figure).  
137 This was within the third rotation step. Thus, in this trajectory, three c-ring rotation steps induced a  
138 complete structural transition in  $F_1$  during the AB process. Of the ten repeated trajectories, six showed

139 similar results; three c-ring rotation steps induced complete  $F_1$  transitions. In the two trajectories, four  
140 c-ring rotation steps were necessary to induce  $F_1$  transitions (one case depicted in Fig. 2b). The  
141 remaining two did not complete the  $F_1$  transition at the end of the simulations (Supplementary Fig.  
142 1a). Thus, as expected from the cryo-EM structures, we observed that in the majority of cases, the  $F_1$   
143 structural transitions in the AB process were completed with the three  $36^\circ$ -c-ring-rotation steps.

144 Next, we describe the BC process. For this process, we first took the 3000th frame snapshot in  
145 the representative trajectory of the AB process (shown in Fig. 2a) as the initial structure. Fig. 2c  
146 shows the typical trajectory of the BC process. In this trajectory, the  $\alpha\beta 1$  and  $\alpha\beta 2$  pairs exhibited  
147 unstable fluctuations until  $\alpha\beta 3$  transitioned from the TP to the E state at the  $\sim 4200$ th frame. Once  $\alpha\beta 3$   
148 is in the E state, both  $\alpha\beta 1$  and  $\alpha\beta 2$  are stabilized in the TP and DP states. The overall structural change  
149 in  $F_1$  was completed after the fourth  $c_{10}$ -ring rotation step. All trajectories which complete  
150 conformational changes (four out of ten) were completed with four c-ring  $36^\circ$ -rotation steps  
151 (Supplementary Fig. 1b). Therefore, we conclude that four  $36^\circ$ -rotation steps are necessary to induce  
152 complete structural changes in  $F_1$  in the BC process with this initial structure. We mentioned about the  
153 BC process on the 4-3-3 pathway in Supplementary Text 1.

154 Finally, the CA process is simulated. First, we started the simulation with the 5000th frame  
155 snapshot of the representative BC process trajectory in the 3-4-3 pathway. Fig. 2e shows a typical  
156 trajectory (Supplementary Fig 1d). Initially,  $\alpha\beta 3$  gradually changed from the E to the DP state  
157 between the 200th and 900th frames. Then,  $\alpha\beta 1$  made the transitions from the TP to the E state and  
158 settled down in the E state at the  $\sim 3100$ th frame right when the third c-ring rotation step in the CA  
159 process was over. This is quickly followed by the transition in  $\alpha\beta 2$  from the DP to the TP state around  
160 the 3300th frame when the overall conformational change in this process was over. The  $F_1$  transition  
161 was completed within the third  $36^\circ$ -c-ring-rotation step in six of the ten trajectories tested. The  $F_1$   
162 transition was completed within the second and fourth  $36^\circ$ -rotation steps, each in one trajectory. The  
163 remaining two trajectories did not exhibit complete structural changes. Therefore, the dominant  
164 pathway in the CA process completes the  $F_1$  state transitions by the three c-ring rotation steps. We  
165 mentioned about the CA process on the 4-3-3 pathway in Supplementary Text 1 and Fig. 2bd.

166           Altogether, our simulation predominantly showed the 3-4-3 pathway, which is in harmony  
167 with the cryo-EM studies. Additionally, we noticed a common feature as suggested in a classic  
168 work<sup>1,32</sup>: Of the three  $F_1$   $\alpha\beta$  structure transitions in each process, the  $\alpha\beta$  that changes from the TP to  
169 the E state is a bottleneck that tends to decide the number of necessary  $36^\circ$ -rotation steps. ATP  
170 synthesis in this enzyme has the rate-limiting process of the product dissociation.

171

## 172 Partial rotation of the $F_1$ stator accompanied by the b-subunits 173 bending

174 Recent cryo-EM studies by Murphy *et al.*<sup>19</sup> and Sobti *et al.*<sup>21</sup> reported more than three rotational states  
175 for ATP synthases from *Polytomella* sp. and *E. coli*, respectively, both of which contain a  $c_{10}$ -ring. In  
176 both cases, they found varying degrees of rotation of the  $F_1$  stator relative to the  $F_0$  stator, raising the  
177 possibility of a partial rotation of the  $F_1$  stator as a mean to solve the symmetry mismatch. However,  
178 these structural models contain only a limited c-ring rotation step. How was the symmetry mismatch  
179 solved in every  $36^\circ$ -rotation step? To address this point, we calculated the rotary angle  $\theta$  of the  $F_1$   
180 stator relative to the  $F_0$  stator during the trajectories (Fig. 3a-e); here, the  $F_1$  stator and the  $F_0$  stator  
181 mean  $F_1$   $\alpha_3\beta_3$  and  $F_0$  a-subunit, respectively. For this purpose, we fixed the rotation axis of the  $F_0$   $c_{10}$ -  
182 ring to the z-axis and  $F_0$  a-subunit to the positive x-axis and monitored the rotary angle  $\theta$  of  $F_1$   $\alpha_3\beta_3$   
183 around the z-axis (further details in the Methods). Fig. 3a-e plot the time courses of  $\theta$  for the same  
184 five trajectories as in Fig. 2a-e.

185           First, we examined the  $F_1$  stator angle  $\theta$  of the AB process (Fig. 3ab). The  $F_1$  stator started to  
186 rotate  $\sim 20^\circ$  counterclockwise dragged by the  $c_{10}\gamma\varepsilon$  rotation. In addition, the  $\gamma$ -subunit is distorted  $\sim$   
187  $10^\circ$  (the fourth panel of Fig. 3a). When the c-ring rotates counterclockwise, the rotation up to  $10^\circ$   
188 tends to be absorbed by the distortion of the  $\gamma$ -subunit. In the subsequence process within the AB  
189 process in the 3-4-3 pathway (Fig. 3a), the  $F_1$  stator tends to return to the initial angle. Importantly,  
190 the return of the  $F_1$  stator angle occurred together with the structural transition in  $F_1$ . Once  $F_1$  adopts



191 conformations compatible with the cryo-EM structure of the B state, the  $F_1$  stator can accommodate  
192 the angle  $\theta \sim 0$  (Fig. 3f, left).

193 Next, we analyzed the simulation trajectories of the BC process in the 3-4-3 pathway (Fig.  
194 3c). When the  $c_{10}$ -ring started to rotate at the 1000th frame (the fourth cumulative c-ring rotation step  
195 is denoted as  $n = 4$ ), the  $F_1$  stator is dragged by the rotor rotation, similarly to the above case ( $n = 1$ ).  
196 At the 1000th frame, while the  $c_{10}$ -ring rotated by  $36^\circ$ , the  $F_1$  stator rotated by  $\sim 20^\circ$ . However, in  
197 sharp contrast to the above AB process, the  $F_1$  stator angle never returned to the initial angle ( $\sim 0^\circ$ )  
198 until the simulation ended ( $n = 5 - 7$ ) (Fig. 3f, right). At the end (the 5000th frame), the  $F_1$  stator  
199 was rotated by  $\sim 20^\circ$ . At this stage, the accumulated rotation in the  $c_{10}$ -ring was  $7 \times 36^\circ$ , counting from  
200 the A state, whereas the  $F_1$  motor made two progressive transitions rotating the chemical states by  
201  $2 \times 120^\circ$ . The difference in the rotation angle,  $7 \times 36^\circ - 2 \times 120^\circ = 12^\circ$ , may be adsorbed by the  
202 counterclockwise rotation of the  $F_1$  stator.

203 Notably, the rotation of the  $F_1$  stator in the BC process is accompanied by a large distortion of  
204 the b-subunit (the right-end extrusion in Fig. 3f right), in which a part that is close to  $F_1$  is rotated  
205 counterclockwise, whereas a part of the b-subunit bound to the  $F_0$  a-subunit remains in the original  
206 position. The distortion of the b-subunit is a passive conformational change. Owing to this distortion,  
207 elastic energy is charged into the b-subunit. We propose that the presence of the b-subunit, in addition  
208 to the balance of rotation angles discussed later, is the reason why the BC process requires more c-  
209 subunits rotation than other processes (Supplementary Text 2). To quantify the motion of the b-  
210 subunit, we performed principal component analysis (PCA) on the b-subunit; the first principal  
211 component (PC1) in the AB process represents a counterclockwise tilt along the  $F_1$  stator (Fig. 3g,  
212 left). The time course of the PC1 value (the third panel in Fig. 3a) indicates that it changes closely in  
213 parallel with the  $F_1$  stator angle  $\theta$ . Note that a positive PC1 indicates a counterclockwise distortion of  
214 the b-subunit (the direction of the arrow in Fig. 3g).

215 Third, we examined the CA process of the 3-4-3 pathway. As shown in Fig. 3e panel, we  
216 observed a clockwise rotation of the  $F_1$  stator back to the initial angle. The b-subunit also followed  
217 clockwise tilting back to the relaxed structure in the A state (third panel in Fig. 3e). Therefore, it can

218 be said that the CA process resolves the distortion caused by the counterclockwise rotation  
219 accumulated in the AB and BC processes. Lastly, we also mentioned the rotation of F<sub>1</sub> stator for the  
220 4-3-3 pathway in [Supplementary Text 1](#).

221

## 222 Relaxation simulations with the fixed c<sub>10</sub>-ring rotary angles

223 While these simulations provided dynamic view to resolve the symmetry mismatch, the obtained  
224 structures are inherently transient due to a relatively fast rotation of c<sub>10</sub>-ring. To obtain well-  
225 equilibrated structures at every 36°-c<sub>10</sub>-ring-rotation steps, which were not seen by cryo-EM studies,  
226 we conducted further MD simulations of relaxation. We fixed the c<sub>10</sub>-ring rotation step at  $n \times 36^\circ$ -  
227 rotation steps for  $n = 1 \sim 10$  and conducted further 2000-frame simulations ten times with the initial  
228 structure taken from the  $n \times 1000$ th frame snapshots in the previous trajectories.

229 We found a clear trend in the AB process. For  $n = 1$ , we started the simulations from the  
230 1000th frame snapshot of the representative trajectory ([the red curve in Fig. 4a](#)), as well as from the  
231 trajectory in which the F<sub>1</sub> rotated the least amount at the 1000th frame among ([the blue curve in Fig.](#)  
232 [4a](#)). Both sets of simulations steadily showed counterclockwise rotations of the F<sub>1</sub> stator with varying  
233 degrees of rotation angles up to  $\sim 30^\circ$  ([Fig. 4b, panel 1](#)). Thus, our simulation models gave consistent  
234 results with recent cryo-EM studies<sup>19</sup>. We also monitored the distortion of rotor c<sub>10</sub>γε ([Supplementary](#)  
235 [Fig. 3](#)). In the  $n = 2$  state, the F<sub>1</sub> stator was rotated  $\sim 20^\circ$ , and then rotated clockwise to  $\sim -10^\circ$  in the  
236 c-ring state  $n = 3$ . Although the angle of the initial structure in  $n = 3$  had a much more  
237 counterclockwise rotated, we found its clockwise rotation back to  $\sim 0^\circ$  during the relaxation simulation  
238 ([the left-side green curve in Fig. 4a](#)). Thus, the clockwise return of the F<sub>1</sub> stator at  $n = 3$  is a robust  
239 process.

240 In the BC process, we observed similar but not identical trends. In the c<sub>10</sub>-ring state  $n = 4$ , the  
241 F<sub>1</sub> stator rotated counterclockwise by  $\sim 20^\circ$ , which is very similar to the c<sub>10</sub>-ring state  $n = 1$ . This  
242 angle was maintained in the c-ring states  $n = 5$  and 6. Particularly, in the  $n = 6$  state, we also  
243 observed marked, albeit incomplete, structural transitions in the F<sub>1</sub> motor. [Supplementary Fig. 4](#)

244 shows that  $\alpha\beta 3$  exhibited irreversible and bottleneck transitions from the TP to E states in four of the  
245 ten trajectories. In the c-ring state  $n = 7$ , which is the final state in the BC process, the  $F_1$  stator is  
246 slightly, but not completely, turned to reach  $\sim +10^\circ$ . A simple estimation may help our understanding:  
247 the c-ring rotated by  $7 \times 36^\circ$  from the A state, while the  $F_1$  motor rotated by  $2 \times 120^\circ$ . The difference  
248 was  $12^\circ$ .

249 Finally, in the CA process, we found the result to be somewhat similar to that of the AB  
250 process (Fig. 4d 8-10). In the  $c_{10}$ -ring state  $n = 8$ , the  $F_1$  stator rotated counterclockwise by  $\sim 30^\circ$ ,  
251 similar to the  $c_{10}$ -ring state  $n = 1$ . We found that the rotor was significantly distorted at  $n = 8$ , which  
252 is different from the  $n = 1$  case. The  $F_1$  stator slightly rotated back but remained rotated at  $\sim 10^\circ$  in the  
253 c-ring state  $n = 9$ . Finally, after the full round, the  $F_1$  stator settled down at the original  $0^\circ$ -angle. To  
254 check if the settled down was robustness, we simulated from another initial state in which the  $F_1$  stator  
255 rotated  $20^\circ$  (the right-side green curve in Fig. 4a). As we expected, we found the same settled down,  
256 therefore, we conclude that the  $F_1$  stator settles down to  $\sim 0^\circ$  when the system is fully relaxed after one  
257 round of the  $c_{10}$ -ring.

258 In summary, we see that the  $F_1$  stator constantly rotates back and forth, dragged by the  $c_{10}$ -  
259 ring rotation and by the chemical state change in  $F_1$ , but eventually returns to its initial position after  
260 the full round. We have discussed the angle change from a typical trajectory, and in the next section,  
261 we will discuss it using more statistical values.

262

## 263 On the symmetry mismatch between $F_O$ and $F_1$

264 The stepwise rotations of the  $F_O$   $c_{10}$ -ring and  $F_1$  motor shown in Fig. 5a (upper panel) illustrate the  
265 symmetry mismatch. By symmetry, the ideal elementary rotation steps of the  $c_{10}$ -ring and  $F_1$  motor  
266 were  $36^\circ$  and  $120^\circ$ , respectively. We assume that the  $c_{10}$ -ring and the  $F_1$  motor rotation steps coincided  
267 at the ground state angle, the A state, chosen as the angle  $0^\circ$  (this is an approximation, but it turned out  
268 reasonable). Then, the  $120^\circ$ -step of the  $F_1$  motor was flanked by  $3 \times 36^\circ = 108^\circ$  and  $4 \times 36^\circ = 144^\circ$  of  
269 the  $c_{10}$ -ring steps with  $108^\circ$ -step closer. It is reasonable to assume that a smaller deviation in the angle  
270 corresponds to a lower energy of frustration. Thus, the  $3 \times 36^\circ = 108^\circ$  step of the  $c_{10}$ -ring may be

271 realized to accommodate the  $F_1$  motor  $120^\circ$ -state. In the same way, the  $240^\circ$ -step of the  $F_1$  motor was  
272 flanked by  $6 \times 36^\circ = 216^\circ$  and  $7 \times 36^\circ = 252^\circ$  of the  $c_{10}$ -ring steps with  $252^\circ$ -step closer. Obviously, the  
273  $360^\circ$ -step was realized both by the c-ring and the  $F_1$  motor without frustration, which led to the 3-4-3  
274 pathway, consistent with all three cryo-EM studies. This minimal-deviation-rule directly provides the  
275 simplest reasoning for the 3-4-3 pathway. The same rule may be applicable to c-rings composed of  
276 subunits other than ten (Fig. 5b). The  $c_8$ -ring, the  $c_9$ -ring, and the  $c_{11}$ -ring may exhibit the 3-2-3, 3-3-3,  
277 and 4-3-4 pathways starting from the ground state.

278 The next question is how to resolve the mismatch between the  $F_O$   $c_{10}$ -ring and the  $F_1$  motor in  
279 the primary rotation states B ( $n = 3$ ) and C ( $n = 7$ ) in the 3-4-3 pathway, namely the difference  
280 between  $120^\circ$  and  $108^\circ$  in the B state and the difference between  $240^\circ$  and  $252^\circ$  in the C state.  
281 Structures provided by Guo *et al.* suggested that the mismatch of the range  $\sim 12^\circ$  can mostly be  
282 compensated by the rotation of the  $F_1$  stator via the distortion of the b-subunit (Table 1, Fig. 5c, and  
283 Supplementary Text 3).

284 The mismatch between the  $F_O$   $c_{10}$ -ring and the  $F_1$  motor increases after the  $36^\circ$  c-ring rotation  
285 from the primary states A, B, and C, namely the rotation states  $n = 1, 4$ , and 8. This range of  
286 mismatches cannot be absorbed by the  $F_1$  stator rotation. Instead, it is realized by the combinations of  
287 the three types of elastic structural changes in the structures of Sobti *et al.* and Murphy *et al.* (Fig. 5c  
288 and Supplementary Text 3): a) the b-subunits accommodate  $\pm(7 - 14)^\circ$ , which appears as the  
289 rotation of the  $F_1$  stator, b) the  $c_{10}$ -ring rotation deviates  $\pm(11 - 13)^\circ$  from the ideal angles, and c) the  
290 rotor distortion is in the range of  $\pm(4 - 11)^\circ$ . In contrast, the  $F_1$  motor showed a fluctuation of only  
291  $\sim \pm 2^\circ$ . It is a key feature that the  $F_1$  motor maintains the canonical angle with slight fluctuations in  
292 all cryo-EM structures. The corresponding angles monitored in our MD simulations are consistent  
293 with these experiments (Fig. 5a, the second and third panels), except that the MD simulations  
294 assumed uniform  $36^\circ$ -rotation steps of the  $c_{10}$ -ring, which is not rigorously the case in cryo-EM  
295 structures.

296 In all the AB, BC, and CA processes, the first  $36^\circ$ -c-ring-rotation step from the primary  
297 rotation states induces the counterclockwise rotation of the  $F_1$  stator ( $n = 1, 4, 8$ ). This is in agreement

298 with the findings of Murphy *et al.*<sup>19</sup>. The second 36°-c-ring-rotation step tends to keep the F<sub>1</sub> stator  
299 rotated, which is often accompanied by significant distortion of the rotor and incomplete transitions in  
300 the F<sub>1</sub> motor ( $n = 2, 5, 9$ ). The F<sub>1</sub> motor may take structures different from canonical three-fold rotary  
301 states. These are strongly frustrated states and are likely too dynamic to be modeled at high resolution  
302 in cryo-EM studies. The simulations showed relatively diverse configurations. Here, we suggest an  
303 interesting scenario: In some of these states, the F<sub>1</sub> motor may utilize the 80° sub-step to the so-called  
304 binding-dwell. Namely, the 80° sub-step of the F<sub>1</sub> motor is close to  $2 \times 36^\circ = 72^\circ$  step of c<sub>10</sub>-ring, the  
305 200° sub-step is close to both  $5 \times 36^\circ = 180^\circ$  and  $6 \times 36^\circ = 216^\circ$  of c<sub>10</sub>-ring, and the 320° sub-step of the F<sub>1</sub>  
306 motor is close to  $9 \times 36^\circ = 324^\circ$  step of c<sub>10</sub>-ring, which may serve to relieve the highly frustrated  
307 energies. In the last 36°-c-ring-rotation step of the AB, BC, and CA processes, the F<sub>1</sub> stator finally  
308 rotates clockwise back to near the original angle ( $n = 3, 7, 10$ ); and the final angles differ in the three  
309 processes:  $\sim -10^\circ$ ,  $\sim +10^\circ$ , and  $\sim 0^\circ$  for the AB, BC, and CA processes, respectively.

310

## 311 Conclusions

312 Using the recently obtained cryo-EM structures of the *Bacillus* PS3 F<sub>0</sub>F<sub>1</sub> ATP synthases, we carried  
313 out MD simulations of the holo-complex that mimicked three cycles of ATP synthesis, the AB, BC,  
314 and CA processes, and one round of rotor rotation. We found that the AB, BC, and CA processes  
315 completed the respective structural changes in F<sub>1</sub> with the highest probabilities when the c<sub>10</sub>-ring  
316 made three, four, and three 36°-rotation steps, which is consistent with the experimental results. At all  
317 ten 36°-step of c<sub>10</sub>-ring rotations, we investigated the holo-complex structural changes that resolve the  
318 symmetry mismatch between F<sub>0</sub> and F<sub>1</sub>. The symmetry mismatch was resolved by the distortion of a  
319 few parts. First, the b-subunit distortion led to the rotation of the F<sub>1</sub> stator back and forth relative to  
320 the F<sub>0</sub> stator. Second, the rotor itself is distorted to a lesser extent. Third, the comparative analysis of  
321 cryo-EM structures from the three species showed that the c-ring rotary angles can be deviated from  
322 symmetric ones. Since the movement of the β-subunit in αβ<sub>2</sub> is suppressed by the b-subunit and ε-  
323 subunit, a stronger torque is required to overcome this barrier during the BC process. Simulation

324 results, together with the comparative analysis of recent cryo-EM structure models, reveal molecular  
325 reasoning to resolve the symmetry mismatch.

326           Since we adopted a simple approach to simulates rotary motions of the ATP synthase holo-  
327 complex, it has some limitations. First, since we used a classical MD with a coarse-grained molecular  
328 representation, the chemical reaction itself was only dealt with conformational changes correlated  
329 with chemical reactions. Second, since we adopted a predefined time course of  $c_{10}$ -ring rotation, we  
330 have not been able to reproduce the effects of stochastic proton transport. Third, since some parts of  
331 the b-subunit around  $\delta$ -subunit was missing in cryo-EM models, we cannot deny the possibility that  
332 this missing region contribute to the conformational change. Despite these limitations, our MD  
333 simulations revealed the mechanical coupling between  $F_1$  and  $F_O$  with reasonable accuracy in detail,  
334 which is sufficient to fully explain the solution of the symmetry mismatch in ATP synthases.

335

## 336 Materials & Methods

### 337 Model building

338 We used the *Bacillus* PS3 ATP synthase structure model for the A state ( Protein Data Bank (PDB)  
339 ID, 6N2Y) obtained by cryo-EM as the reference structure for the corresponding A state in our MD  
340 simulations<sup>5</sup>. The model consists of eight proteins and 22 subunits,  $\alpha_2\beta_3\gamma\delta\epsilon$ . Based on the PDB  
341 structure, we modeled loops for the missing regions in the  $\alpha$ -subunit using MODELLER<sup>33</sup>. For the  
342 sake of structural symmetry, the range of residues used for three  $\alpha$ - and  $\beta$ -subunits was made the  
343 same: I8 to S501 for  $\alpha$ -subunits and T2 to M469 for  $\beta$ -subunits. In addition, one of the  $\beta$ -subunits  
344 (called  $\beta_2$  in the original PDB data) contains a C-terminal region that is neither modeled nor has a  
345 sequence assigned. This region was excluded from the simulation system. We established the  
346 coordinate system such that the center of masses of the  $F_0$   $c_{10}$ -ring was set at its original point, the  
347 rotation axis of the  $c_{10}$ -ring coincided with the  $z$ -axis, and R169 of the  $F_0$   $\alpha$ -subunit was on the  $x$ -axis.

348 We also prepared reference structure information for B and C states. Notably, we did not use  
349 the structural models given in the PDB for these states. Instead, we mostly used the structure  
350 information for the A state because we assumed that the A state was the ground-state form. In the  
351 structure-based simulation, the reference structure for each subunit was used to define the lowest  
352 energy state of the subunit, except for the structures of  $\alpha_3\beta_3$ . Assuming a change in the chemical state  
353 and the corresponding change in the stable conformation, we repositioned the reference structures in a  
354 rotary manner. For example, the reference structure information of  $\alpha\beta_1$  in the B state, which is in the  
355 DP state, was copied from the reference structure of  $\alpha\beta_3$  in the A state, having the same DP state.  
356 Similarly, all reference structure information could be obtained from those in the A state.

357

358

## 359 MD simulation setting

360 We performed coarse-grained MD simulations using the reference structure described above. In the  
361 coarse-grained representation, one amino acid was treated as one particle located at the  $C\alpha$  position.  
362 We primarily used the energy function AICG2+<sup>34,35</sup>, which has been intensively used in simulations of  
363 large molecular complexes<sup>25,36,37</sup>. In this function, the reference structure was assumed to be the most  
364 stable conformation, and many parameters inside were determined from the atomic interactions in the  
365 all-atom reference structures (detail in [Supplementary Text 4](#)).

366 In this study, to investigate the mechanical coupling between  $F_O$  and  $F_1$  parts, we designed a  
367 minimal setup that mimicked ATP synthesis reactions induced by the c-ring rotation driven by the  
368 proton-motive-force in a simple design. Assuming the c-ring rotation driven by the proton-motive  
369 force, we made the c-ring rotate with a predefined time course. In the  $F_1$  part, for each  $\alpha\beta$  pair that  
370 sandwiches the ATP catalytic site, we set multiple basins that encode ATP-bound (TP), ADP-bound  
371 (DP), and empty (E) state conformations. When the state transition settled to the new state, we  
372 considered that the corresponding chemical event occurred (detail in [Supplementary Text 5](#)).

373 In our minimal design, the  $F_O$  a-subunit was a rigid part of the  $F_O$  stator and was fixed to the  
374 initial structure and position. The  $F_O$   $c_{10}$ -ring was treated as a rigid body and rotated by design around  
375 the z-axis with a predefined schedule.

376 With these setups, we ran simulations on several processes: AB, BC, and CA. First, in the AB  
377 process, the simulation started from the reference structure built from PDB ID: 6N2Y. In the  
378 simulation, the  $c_{10}$ -ring rotated stepwise  $36^\circ$  by  $36^\circ$  as designed. The coupling between  $F_O$  and  $F_1$  led  
379 the three double-basin systems of the  $F_1$ -motor to exhibit their conformations and reach the post-state  
380 (state B). Then, we selected a representative snapshot from the trajectory and treated it as the initial  
381 model for the subsequent simulation of the BC process. The simulation of the BC process began with  
382 this model. After three or four c-ring  $36^\circ$ -rotation steps, we also picked a representative snapshot of  
383 the initial structure of the CA process. Finally, we performed a CA simulation. In each simulation, we  
384 repeated 10 MD runs with different stochastic forces using CafeMol version 2.1<sup>38</sup>. Unless otherwise  
385 noted, we took  $4 \times 10^7$  MD steps,  $5 \times 10^7$  MD steps, and  $5 \times 10^7$  MD steps for the AB, BC, and CA



386 processes, respectively. We used underdamped Langevin dynamics at 323 K temperature and set the  
387 friction coefficient to 2.0 (CafeMol unit); default values were used for the others.

## 388 Data Availability

389 The cryo-EM structures used in this paper are available download from the Protein Data Bank under  
390 PDB IDs 6N2Y, 6N2Z, and 6N30 for the *Bacillus* PS3 ATP synthase; 6WNQ, 6OQV, 6OQR, 6OQS,  
391 6OQT, 6OQU, 6PQV, 6OQW, and 6WNR for the *E. coli* ATP synthase; 6RDH, 6RDW, 6RDZ,  
392 6RE8, 6REB, and 6RES for the *Polytomella* sp. ATP synthase.

393

## 394 Code Availability

395 All MD simulations in this paper was performed by CafeMol software. It can be downloaded from  
396 <https://www.cafemol.org>.

397

## 398 References

- 399 1. Boyer, P. D. The ATP synthase - A splendid molecular machine. *Annu. Rev. Biochem.* **66**,  
400 717–749 (1997).
- 401 2. Yoshida, M., Muneyuki, E. & Hisabori, T. ATP synthase - A marvellous rotary engine of the  
402 cell. *Nat. Rev. Mol. Cell Biol.* **2**, 669–677 (2001).
- 403 3. Walker, J. E. The ATP synthase: The understood, the uncertain and the unknown. *Biochem.*  
404 *Soc. Trans.* **41**, 1–16 (2013).
- 405 4. Abrahams, J. P., Leslie, A. G. W., Lutter, R. & Walker, J. E. Structure at 2.8 Å resolution of  
406 F1-ATPase from bovine heart mitochondria. *Nature* **370**, 621–628 (1994).
- 407 5. Guo, H., Suzuki, T. & Rubinstein, J. L. Structure of a bacterial ATP synthase. *elife* **8**, 1–17  
408 (2019).
- 409 6. Noji, H., Yasuda, R., Yoshida, M. & Kinosita Jr., K. Direct observation of the rotation of F1-  
410 ATPase. *Nature* **386**, 299–302 (1997).
- 411 7. Watt, I. N., Runswick, M. J., Montgomery, M. G., Walker, J. E. & Leslie, A. G. W.  
412 Bioenergetic cost of making an adenosine triphosphate molecule in animal mitochondria.  
413 *Proc. Natl. Acad. Sci.* **107**, 16823–16827 (2010).
- 414 8. Stock, D., Leslie, A. G. W. & Walker, J. E. Molecular architecture of the rotary motor in ATP  
415 synthase. *Science* **286**, 1700–1705 (1999).

- 416 9. Mitome, N., Suzuki, T., Hayashi, S. & Yoshida, M. Thermophilic ATP synthase has a decamer  
417 c-ring: Indication of noninteger 10:3 H<sup>+</sup>/ATP ratio and permissive elastic coupling. *Proc.*  
418 *Natl. Acad. Sci.* **101**, 12159–12164 (2004).
- 419 10. Meier, T., Polzer, P., Diederichs, K., Welte, W. & Dimroth, P. Structure of the rotor ring of F-  
420 type Na<sup>+</sup>-ATPase from *Ilyobacter tartaricus*. *Science*. **308**, 659–662 (2005).
- 421 11. Matthies, D. *et al.* The c13 ring from a thermoalkaliphilic ATP synthase reveals an extended  
422 diameter due to a special structural region. *J. Mol. Biol.* **388**, 611–618 (2009).
- 423 12. Vollmar, M., Schlieper, D., Winn, M., Büchner, C. & Groth, G. Structure of the c14 rotor ring  
424 of the proton translocating chloroplast ATP synthase. *J. Biol. Chem.* **284**, 18228–18235  
425 (2009).
- 426 13. Pogoryelov, D., Yildiz, Ö., Faraldo-Gómez, J. D. & Meier, T. High-resolution structure of the  
427 rotor ring of a proton-dependent ATP synthase. *Nat. Struct. Mol. Biol.* **16**, 1068–1073 (2009).
- 428 14. Düser, M. G. *et al.* 36° step size of proton-driven c-ring rotation in F<sub>o</sub>F<sub>1</sub>-ATP synthase.  
429 *EMBO J.* **28**, 2689–2696 (2009).
- 430 15. Sielaff, H., Yanagisawa, S., Fräsch, W. D., Junge, W. & Börsch, M. Structural asymmetry and  
431 kinetic limping of single rotary F-ATP synthases. *Molecules* **24**, 24–29 (2019).
- 432 16. Pänke, O. & Rumberg, B. Kinetic modeling of rotary CF<sub>0</sub>F<sub>1</sub>-ATP synthase: Storage of elastic  
433 energy during energy transduction. *Biochim. Biophys. Acta* **1412**, 118–128 (1999).
- 434 17. Cherepanov, D. A., Mulkidjanian, A. Y. & Junge, W. Transient accumulation of elastic energy  
435 in proton translocating ATP synthase. *FEBS Lett.* **449**, 1–6 (1999).
- 436 18. Okazaki, K. & Hummer, G. Elasticity, friction, and pathway of  $\gamma$ -subunit rotation in F<sub>o</sub>F<sub>1</sub>-  
437 ATP synthase. *Proc. Natl. Acad. Sci.* **112**, 10720–10725 (2015).
- 438 19. Murphy, B. J. *et al.* Rotary substates of mitochondrial ATP synthase reveal the basis of  
439 flexible F<sub>1</sub>-F<sub>o</sub> coupling. *Science*. **364**, (2019).
- 440 20. Stewart, A. G., Lee, L. K., Donohoe, M., Chaston, J. J. & Stock, D. The dynamic stator stalk  
441 of rotary ATPases. *Nat. Commun.* **3**, (2012).
- 442 21. Sobti, M. *et al.* Cryo-EM structures provide insight into how E. coli F<sub>1</sub>F<sub>o</sub> ATP synthase  
443 accommodates symmetry mismatch. *Nat. Commun.* **11**, (2020).
- 444 22. Mukherjee, S. & Warshel, A. Electrostatic origin of the mechanochemical rotary mechanism  
445 and the catalytic dwell of F<sub>1</sub>-ATPase. *Proc. Natl. Acad. Sci. U. S. A.* **108**, 20550–20555  
446 (2011).
- 447 23. Bai, C., Asadi, M. & Warshel, A. The catalytic dwell in ATPases is not crucial for movement  
448 against applied torque. *Nat. Chem.* **12**, 1187–1192 (2020).
- 449 24. Pu, J. & Karplus, M. How subunit coupling produces the  $\gamma$ -subunit rotary motion in F<sub>1</sub>-  
450 ATPase. *Proc. Natl. Acad. Sci. U. S. A.* **105**, 1192–1197 (2008).
- 451 25. Kubo, S., Niina, T. & Takada, S. Molecular dynamics simulation of proton-transfer coupled  
452 rotations in ATP synthase FO motor. *Sci. Rep.* **10**, 8225 (2020).
- 453 26. Pogoryelov, D. *et al.* Microscopic rotary mechanism of ion translocation in the F(o) complex  
454 of ATP synthases. *Nat. Chem. Biol.* **6**, 891–899 (2010).
- 455 27. Hayashi, S. *et al.* Molecular mechanism of ATP hydrolysis in F<sub>1</sub>-ATPase revealed by  
456 molecular simulations and single-molecule observations. *J. Am. Chem. Soc.* **134**, 8447–8454  
457 (2012).
- 458 28. Dittrich, M., Hayashi, S. & Schulten, K. On the mechanism of ATP hydrolysis in F<sub>1</sub>-ATPase.  
459 *Biophys. J.* **85**, 2253–2266 (2003).
- 460 29. Okazaki, K., Koga, N., Takada, S., Onuchic, J. N. & Wolynes, P. G. Multiple-basin energy  
461 landscapes for large-amplitude conformational motions of proteins: Structure-based molecular  
462 dynamics simulations. *Proc. Natl. Acad. Sci. U. S. A.* **103**, 11844–11849 (2006).
- 463 30. Best, R. B., Chen, Y. G. & Hummer, G. Slow protein conformational dynamics from multiple  
464 experimental structures: The helix/sheet transition of Arc repressor. *Structure* **13**, 1755–1763  
465 (2005).
- 466 31. Maragakis, P. & Karplus, M. Large amplitude conformational change in proteins explored  
467 with a plastic network model: Adenylate kinase. *J. Mol. Biol.* **352**, 807–822 (2005).
- 468 32. Boyer, P. D. The binding change mechanism for ATP synthase - Some probabilities and  
469 possibilities. *Biochim. Biophys. Acta* **1140**, 215–250 (1993).

- 470 33. Šali, A. & Blundell, T. L. Comparative protein modelling by satisfaction of spatial restraints.  
471 *J. Mol. Biol.* **234**, 779–815 (1993).
- 472 34. Li, W., Terakawa, T., Wang, W. & Takada, S. Energy landscape and multiroute folding of  
473 topologically complex proteins adenylate kinase and 2ouf-knot. *Proc. Natl. Acad. Sci.* **109**,  
474 17789–17794 (2012).
- 475 35. Li, W., Wang, W. & Takada, S. Energy landscape views for interplays among folding,  
476 binding, and allostery of calmodulin domains. *Proc. Natl. Acad. Sci. U. S. A.* **111**, 10550–  
477 10555 (2014).
- 478 36. Takada, S. *et al.* Modeling structural dynamics of biomolecular complexes by coarse-grained  
479 molecular simulations. *Acc. Chem. Res.* **48**, 3026–3035 (2015).
- 480 37. Kubo, S., Li, W. & Takada, S. Allosteric conformational change cascade in cytoplasmic  
481 dynein revealed by structure-based molecular simulations. *PLoS Comput. Biol.* **13**, 8502  
482 (2017).
- 483 38. Kenzaki, H. *et al.* CafeMol: A coarse-grained biomolecular simulator for simulating proteins  
484 at work. *J. Chem. Theory Comput.* **7**, 1979–1989 (2011).
- 485  
486

487

## 488 Acknowledgements

489 S.K. was supported by JSPS Research Fellowship. This work was also supported by the MEXT grant  
490 JPMXP1020200101 as "Program for Promoting Researches on the Supercomputer Fugaku" (ST),  
491 partly by JSPS KAKENHI grants 20H0593 (ST) and 21H02441 (ST), and by by the Japan Science  
492 and Technology Agency (JST) grant JPMJCR1762 (ST).

493

## 494 Author Contributions

495 S.K. and S.T. conceived and designed the project; T.N. developed the simulation code; S.K.  
496 performed the simulations; S.K. and T.N. analyzed the data; S.K. assembled figures, and all authors  
497 discussed the results and were involved in the manuscript writing process.

498

## 499 Competing Interests statement

500 The authors declare no competing interests.

501

502

503

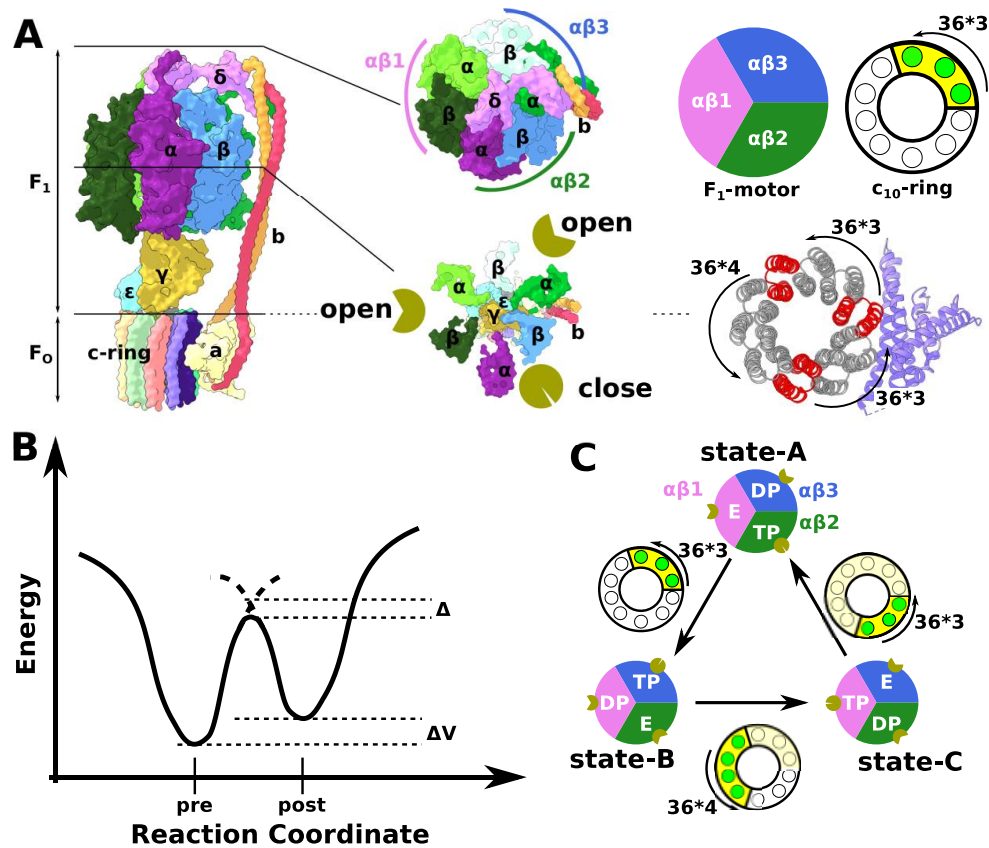

504

505 **Fig. 1 Structure of F<sub>0</sub>F<sub>1</sub> ATP synthase and the simulation system.**

506 a. (Leftmost) The structure of *Bacillus* PS3 F<sub>0</sub>F<sub>1</sub> ATP synthase holo-complex (the A state, PDB ID:  
 507 6N2Y). The F<sub>1</sub> motor (top half) contains  $\delta$ : pink;  $\alpha_3\beta_3$  hexamer made of three  $\alpha\beta$  pairs,  $\alpha\beta_1$ : lime  
 508 green and green;  $\alpha\beta_2$ : violet and sky blue;  $\alpha\beta_3$ : yellow green and white;  $\gamma$ : dark yellow;  $\epsilon$ : cyan. The  
 509 F<sub>0</sub> motor contains c<sub>10</sub>-ring: pastel-colored barrel-shaped objects; a-subunit: pale yellow; b-subunits:  
 510 pale red and orange. In the 6N2Y structure,  $\alpha\beta_1$ ,  $\alpha\beta_2$ , and  $\alpha\beta_3$  take the E, TP, and DP states,  
 511 respectively, and these take the open, closed, and open structures, respectively indicated by golden pie  
 512 chart pictures. (Right) Guo *et al.* built three different ATP synthase conformations: A (PDB ID:  
 513 6N2Y), B (6N2Z), and C (6N30). The structure differences from A to B (AB), B to C (BC), and C to  
 514 A (CA) contain three, four, and three 36°-c<sub>10</sub>-ring-positional-rotation in a counterclockwise direction,  
 515 respectively. The red c-subunits indicate the ones closest to the a-subunit in the A, B, and C states. **b.**  
 516 The schematic view of the double-basin model. "pre" and "post" indicate the minimum energy  
 517 structures for the pre- and post-structures, respectively.  $\Delta$  and  $\Delta V$  are parameters to control the barrier

518 height and relative stability between two minima. **c.** The conformational change cycle in the ATP  
 519 synthesis mode.  
 520

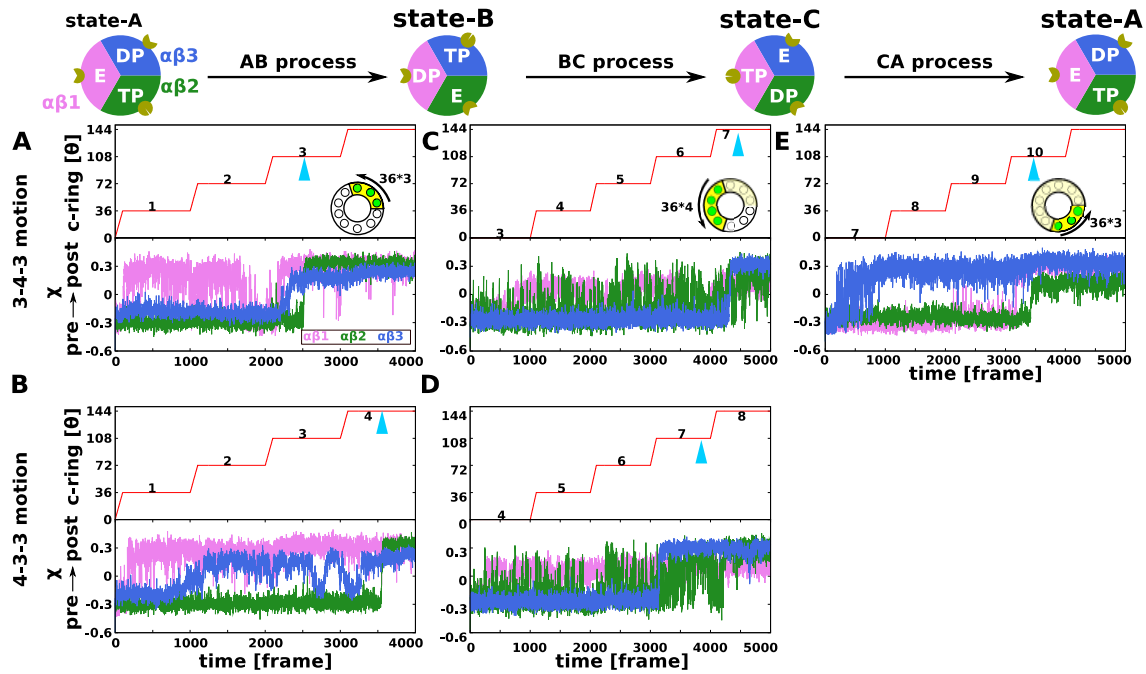

521  
 522 **Fig. 2 Structure change in the F<sub>1</sub> motor during MD simulations of one round c<sub>10</sub>-ring rotations.**  
 523 **a-e.** Representative MD simulation trajectories for the AB (panel A), BC (panel C), and CA (panel E)  
 524 processes in the 3-4-3 pathway, and for the AB (panel B) and BC (panel D) processes in the 4-3-3  
 525 pathway. Results of all the 10 trajectories are given in **Supplementary Fig. 1**. Each panel shows the  
 526 c<sub>10</sub>-ring rotation time schedule (upper) and the reaction coordinate for the structure changes: χ of the  
 527 αβ1, αβ2, and αβ3 (red, green, and blue, respectively) (bottom). The triangle mark colored cyan shows  
 528 the timing when all the three αβ's completed their structural changes. The CA process trajectories in  
 529 the 4-3-3 motion is shown in **Supplementary Fig. 2**. One frame of time corresponds to 10<sup>4</sup> MD steps.  
 530

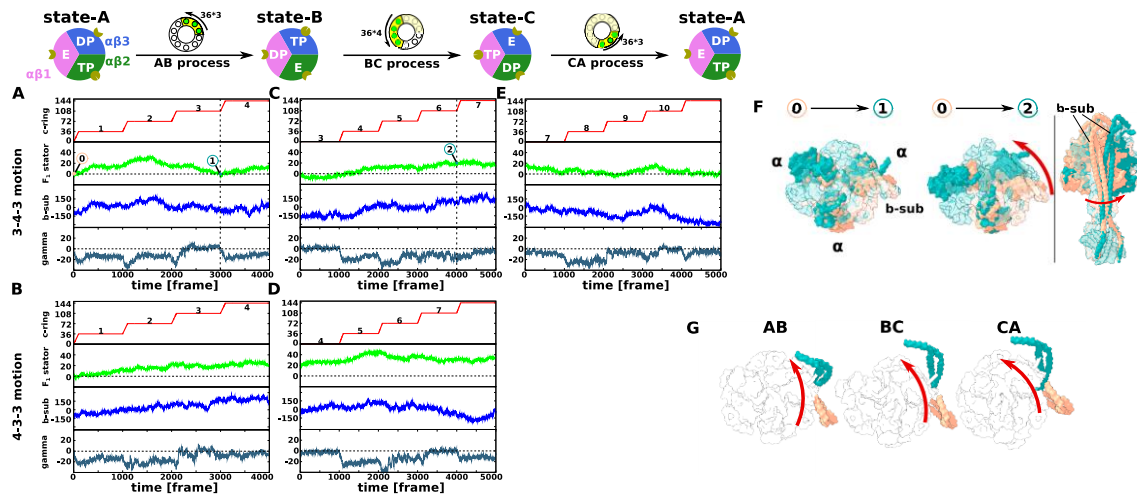

531

532 **Fig. 3  $F_0$ - $F_1$  coupling during MD simulations of one round  $c_{10}$ -ring rotations.**

533 **a-e.** Each panel plots, from the top to bottom, the rotation angle of the  $c_{10}$ -ring, the rotation angle of

534 the  $F_1$  stator, the first principal component about the b-subunit motions, and the rotation angle of the

535 rotor defined by the angle of the upper part of  $\gamma$ -subunit relative to the rotation angle of  $c_{10}$ -ring (the

536 moving average over 10 frames) for the same trajectories as those shown in Fig. 2a-e. **f.**

537 Superimposed snapshots shown in Fig. 3a-c trajectories 0, 1, and 2, respectively. The snapshot at time

538 point 0 is colored dark salmon, and those at time point 1 and 2 are colored dark cyan. The three  $\alpha$ -

539 subunits are opaque to make it easier to see, and the others are translucent. **g.** The direction of

540 structural change of the first principal component in the principal component analysis for the b-

541 subunit. The first principal component value increases from dark salmon to dark cyan.

542

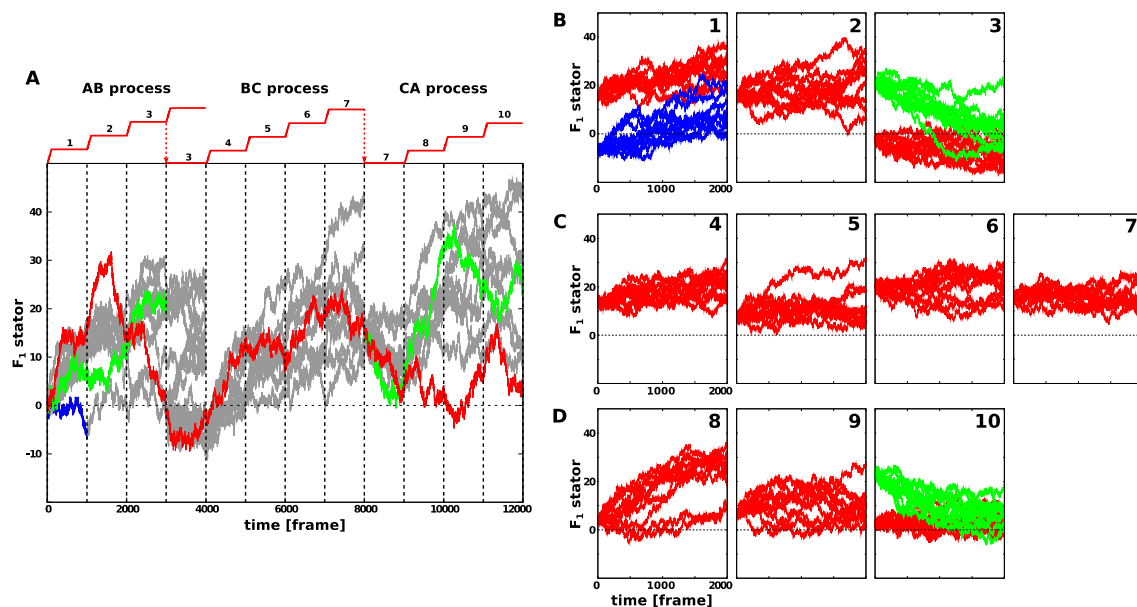

543

544 **Fig. 4 Relaxation simulation with the  $c_{10}$ -ring rotation angle fixed at every  $n \times 36^\circ$  step.**

545 **a.** Reference trajectories from which relaxation simulations were conducted. The  $F_1$  stator rotation  
 546 angle is depicted. Red: the representative one plotted in **Figs. 2 and 3**. Green in 0-3000th frame: one  
 547 that was rotated markedly at the 3000th frame. Green in 8000-12000th frame: a case where the  $F_1$   
 548 stator was largely rotated at the end. Blue: a case where the  $F_1$  stator was least rotated. Gray: all the  
 549 other trajectories. **b-d.** Each panel plots the time course of the  $F_1$  stator angle in the relaxation  
 550 simulation with  $c_{10}$ -ring fixed to the  $n \times 36^\circ$  rotation angle. Each simulation started from the snapshot  
 551 of the reference trajectory in **a** at the corresponding time. **b.** the  $c_{10}$ -ring rotation state  $n = 1, 2,$  and 3  
 552 in the AB process. **c.**  $n = 4, 5, 6,$  and 7 in the BC process. **d.**  $n = 8, 9,$  and 10 in the CA process.

553

554

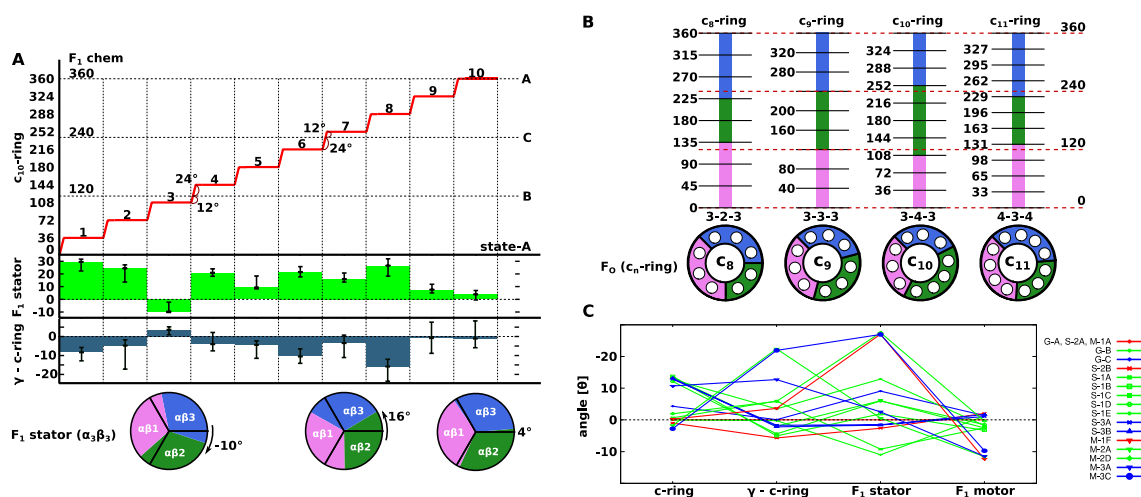

555

556 **Fig. 5 The  $F_0$ - $F_1$  coupling and the symmetry mismatch in ATP synthesis process.**

557 **a.** Summary of the symmetry mismatch and the elastic structure changes. The stepwise  $c_{10}$ -ring  
 558 rotation (the red ladder), the  $F_1$  motor rotation (the horizontal dashed line), the  $F_1$  stator rotation via  
 559 the distortion of the b-subunit (the green bar in the second panel), and the rotor distortion (the blue bar  
 560 in the third panel) are depicted for every  $n \times 36^\circ$   $c_{10}$ -ring rotation step. **b.** Predicted rotation pathways  
 561 are described for systems with different number of c-subunits. **c.** Four elements of structure  
 562 distortions found in cryo-EM studies. c-ring, the deviation of the c-ring rotation angle from its ideal  
 563 angle.  $\gamma$ - c-ring, the rotary angle of the  $\gamma$ -subunit at its interaction site to  $\alpha\beta$  minus the c-ring rotation



564 angle.  $F_1$  stator, the  $F_1$  stator rotation angle relative to the  $F_0$  stator.  $F_1$  motor, the rotation of the  $\gamma$ -

565 subunit relative to the  $F_1$  stator  $\alpha_3\beta_3$ .

566

567 **Table 1 Rotary angles in cryo-EM structures of three ATP synthases.**

| Guo                        | c <sub>10</sub> -ring | n <sup>1)</sup> | $\gamma - c_{10}$ -ring <sup>2)</sup> | F <sub>1</sub> stator <sup>3)</sup> | F <sub>1</sub> motor <sup>4)</sup> | m <sup>5)</sup> |
|----------------------------|-----------------------|-----------------|---------------------------------------|-------------------------------------|------------------------------------|-----------------|
| 6N2Y (state-A)             | 0                     | 0/10            | 0                                     | 0                                   | 0                                  | 0/3             |
| 6N2Z (state-B)             | 108.0(-0.0)           | 3               | -0.2                                  | -11.0                               | 118.8 (1.2)                        | 1               |
| 6N30 (state-C)             | 247.7(4.3)            | 7               | 0.1                                   | 9.1                                 | 238.7 (1.3)                        | 2               |
| Sobti                      |                       |                 |                                       |                                     |                                    |                 |
| 6WNQ (2A) A <sup>Guo</sup> | 0                     | 0/10            | 0                                     | 0                                   | 0                                  | 0/3             |
| 6OQV (2B)                  | -1.0(-1.0)            | 0/10            | -5.7                                  | -2.6                                | -2.0 (2.0)                         | 0/3             |
| 6OQR (1A) B <sup>Guo</sup> | 107.3 (0.7)           | 3               | 6.0                                   | -9.2                                | 122.5 (-2.5)                       | 1               |
| 6OQS (1B)                  | 130.3 (13.7)          | 4               | -5.1                                  | 1.9                                 | 123.3 (-3.3)                       | 1               |
| 6OQT (1C)                  | 130.6 (13.4)          | 4               | -2.0                                  | 6.0                                 | 122.5 (-2.5)                       | 1               |
| 6OQU (1D)                  | 131.9 (12.1)          | 4               | -4.4                                  | 6.0                                 | 121.5 (-1.5)                       | 1               |
| 6PQV (1E)                  | 131.2 (12.8)          | 4               | 3.5                                   | 12.9                                | 121.8 (-1.8)                       | 1               |
| 6OQW (3A) C <sup>Guo</sup> | 239.1 (12.98)         | 7               | -1.7                                  | -1.5                                | 238.9 (1.1)                        | 2               |
| 6WNR(3B)                   | 238.8 (13.2)          | 7               | -2.2                                  | -1.7                                | 238.3 (1.7)                        | 2               |
| Murphy                     |                       |                 |                                       |                                     |                                    |                 |
| 6RDH(1A) A <sup>Guo</sup>  | 0                     | 0/10            | 0                                     | 0                                   | 0                                  | 0/3             |
| 6RDW(1F)                   | 35.7 (0.3)            | 1               | 3.6                                   | 27.1                                | 12.3 (-12.3)                       | 0/3             |
| 6RDZ(2A) B <sup>Guo</sup>  | 109.8 (-1.8)          | 3               | 22.4                                  | 0.6                                 | 131.6 (-11.6)                      | 1               |
| 6RE8(2D)                   | 142.1 (1.9)           | 4               | 5.8                                   | 27.5                                | 120.4 (-0.4)                       | 1               |
| 6REB(3A) C <sup>Guo</sup>  | 241.3 (10.7)          | 7               | 12.7                                  | 2.6                                 | 251.5 (-11.5)                      | 2               |
| 6RES(3C)                   | 254.8 (-2.8)          | 7               | 21.9                                  | 26.9                                | 249.7 (-9.7)                       | 2               |

568 The angle value is in degrees. The value in parentheses is the deviation from the ideal value from its symmetry.

569 <sup>1)</sup> The c<sub>10</sub>-ring rotation step. <sup>2)</sup> The distortion of the rotor is defined by the difference between the angle of the  
570 upper part of the  $\gamma$ -subunit and the rotation angle of the c-ring. <sup>3)</sup> The rotation angle of the F<sub>1</sub> stator relative to  
571 the F<sub>0</sub> stator. <sup>4)</sup> The difference between the angles of the F<sub>1</sub> stator and F<sub>1</sub> rotor. <sup>5)</sup> F<sub>1</sub> motor rotation step.
