# Supplementary material for: F0-F1 coupling and symmetry mismatch in ATP synthase resolved in every F0 rotation step
Source: bioRxiv or medRxiv preprint supplement (doi:10.1101/2021.11.14.468453), 2021-11-14
Supplement: Supplementary file [file media-1.pdf]

1

# Supplementary Information

## 2 Supplementary Figures

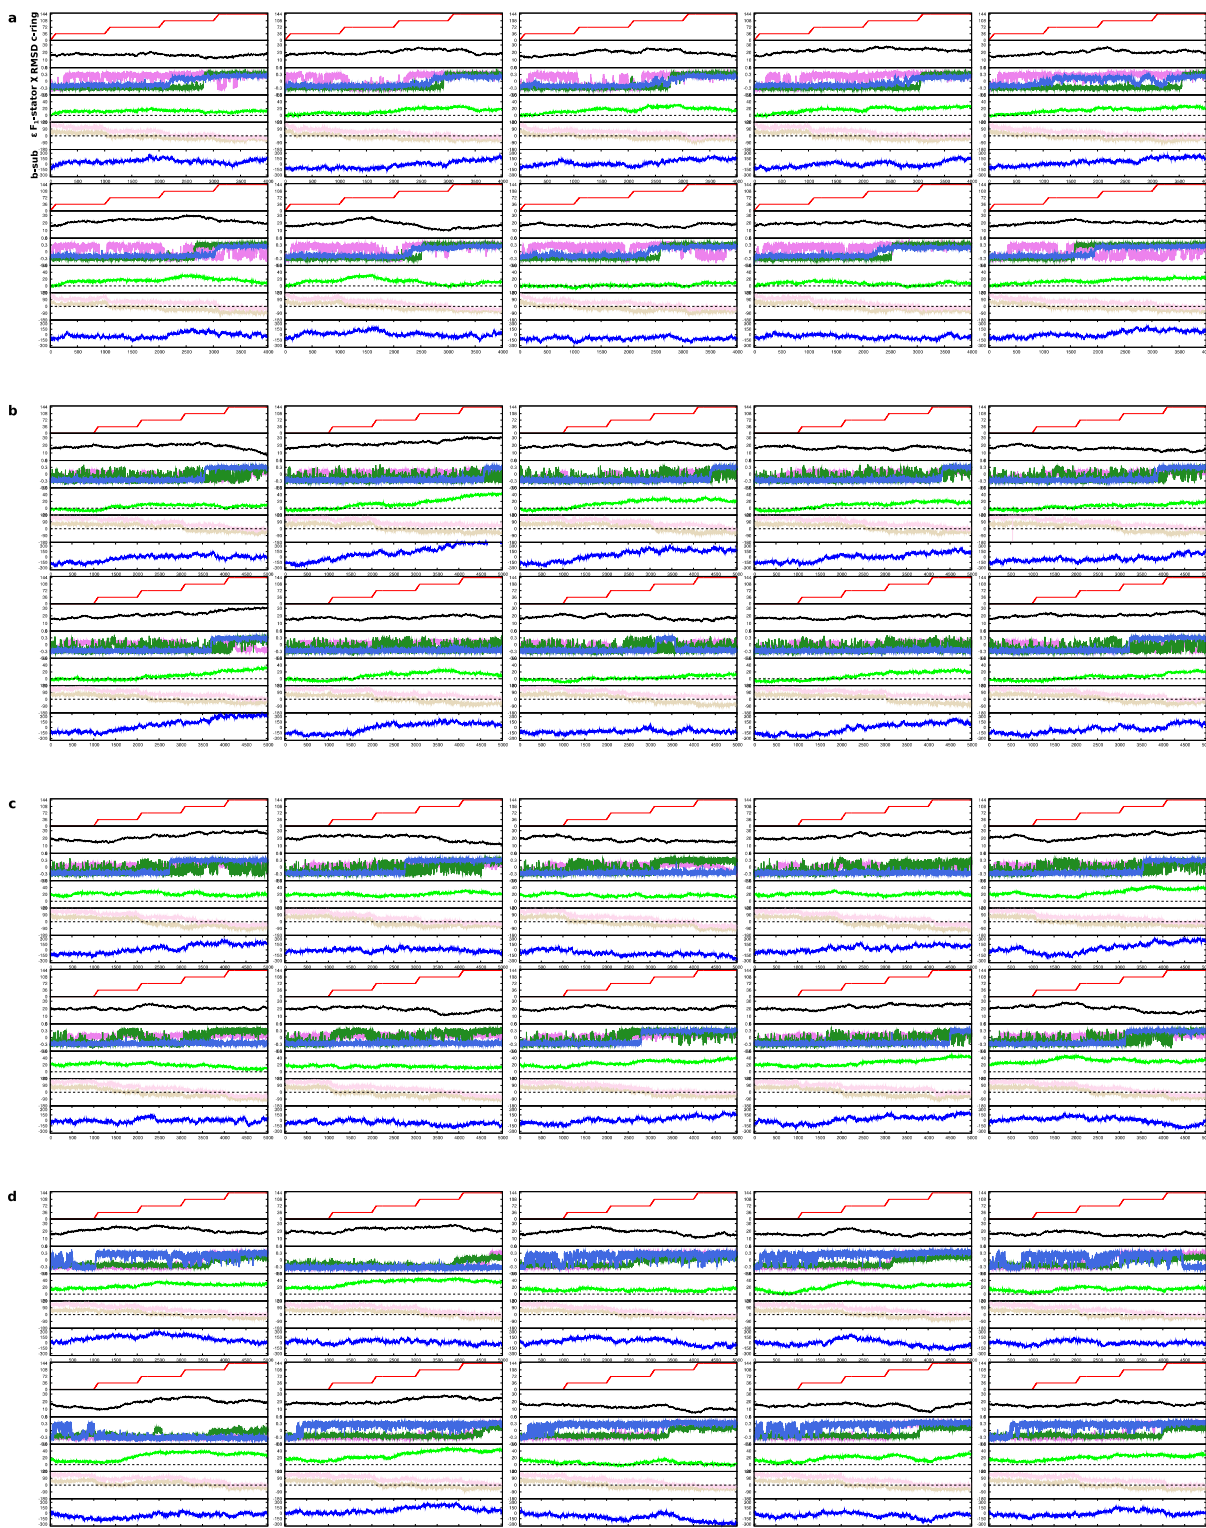

3

4 **Supplementary Fig. 1 All the MD simulation trajectories.**

5 All 10 MD simulation trajectories represent the AB, BC, and CA processes. Each panel shows, from  
6 the top to the bottom, the  $c_{10}$ -ring rotation angle (red), the RMSD from PDB ID 6N2Z, 6N30, and  
7 6N2Y in the AB, BC, and CA processes, respectively (black), the reaction coordinates  $\chi$  of  $\alpha\beta 1$ ,  $\alpha\beta 2$ ,  
8 and  $\alpha\beta 3$  (red, green, and blue, respectively),  $F_1$  stator rotation angle (green), angle between  $\epsilon$ - and  $\alpha/\beta$ -  
9 subunit of system-2 (pale orange and pale pink, respectively), and the first principal component of the  
10 b-subunits (blue). **a.** The AB process. **b.** BC process in the 3-4-3 pathway. **c.** BC process in the 4-3-3  
11 pathway. **d.** CA process in the 3-4-3 pathway.

12

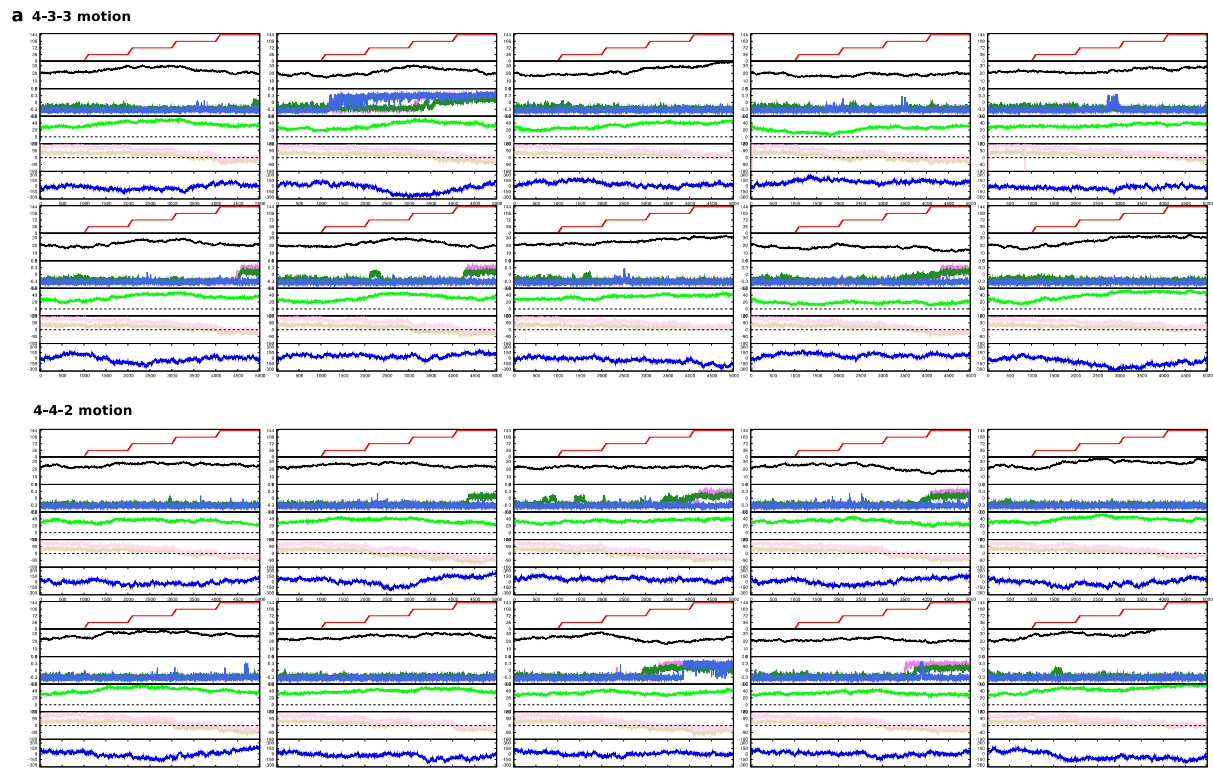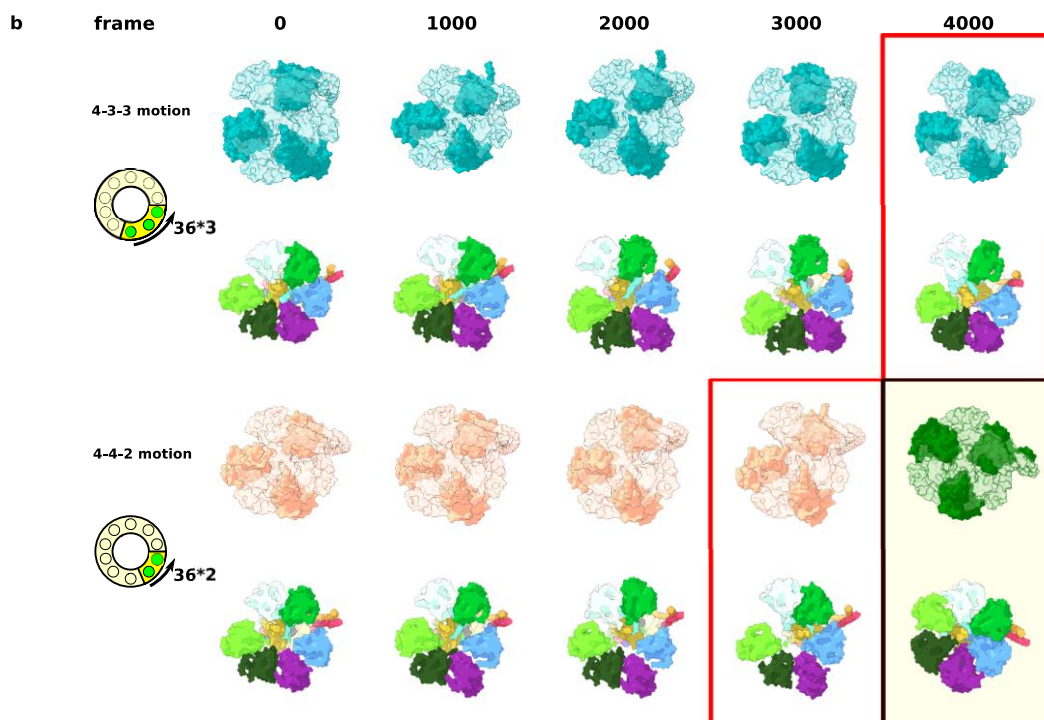

13

14 **Supplementary Fig. 2 CA process in the 4-3-3 and 4-4-2 pathways.**

15 **a.** The CA process trajectories in 4-3-3 and 4-2-2 pathways. Each panel shows the same quantities as  
 16 Supplementary Fig. 1. The above and bottom trajectories start from the 3800th and 4500th frames of  
 17 the BC process trajectory shown in the Fig. 2A lower and middle, respectively, thus corresponding to

18 the 4-3-3 and 4-2-2 pathways. **b.** Snapshots of every 1000 frames taken from each representative  
19 trajectory in Supplementary Fig. 2a. Three  $\alpha$ -subunits are in dark cyan (for the 4-3-3 pathway) and  
20 dark salmon (the 4-4-2). The color-coded below are the section cut at the 256th residue of the three  $\alpha$ -  
21 subunits. The two red boxes show the structures at the moment when the  $c_{10}$ -ring has just come to the  
22 initial position in each system. The black box is the original state-A structure shown in the same way  
23 with the other snapshots.  
24



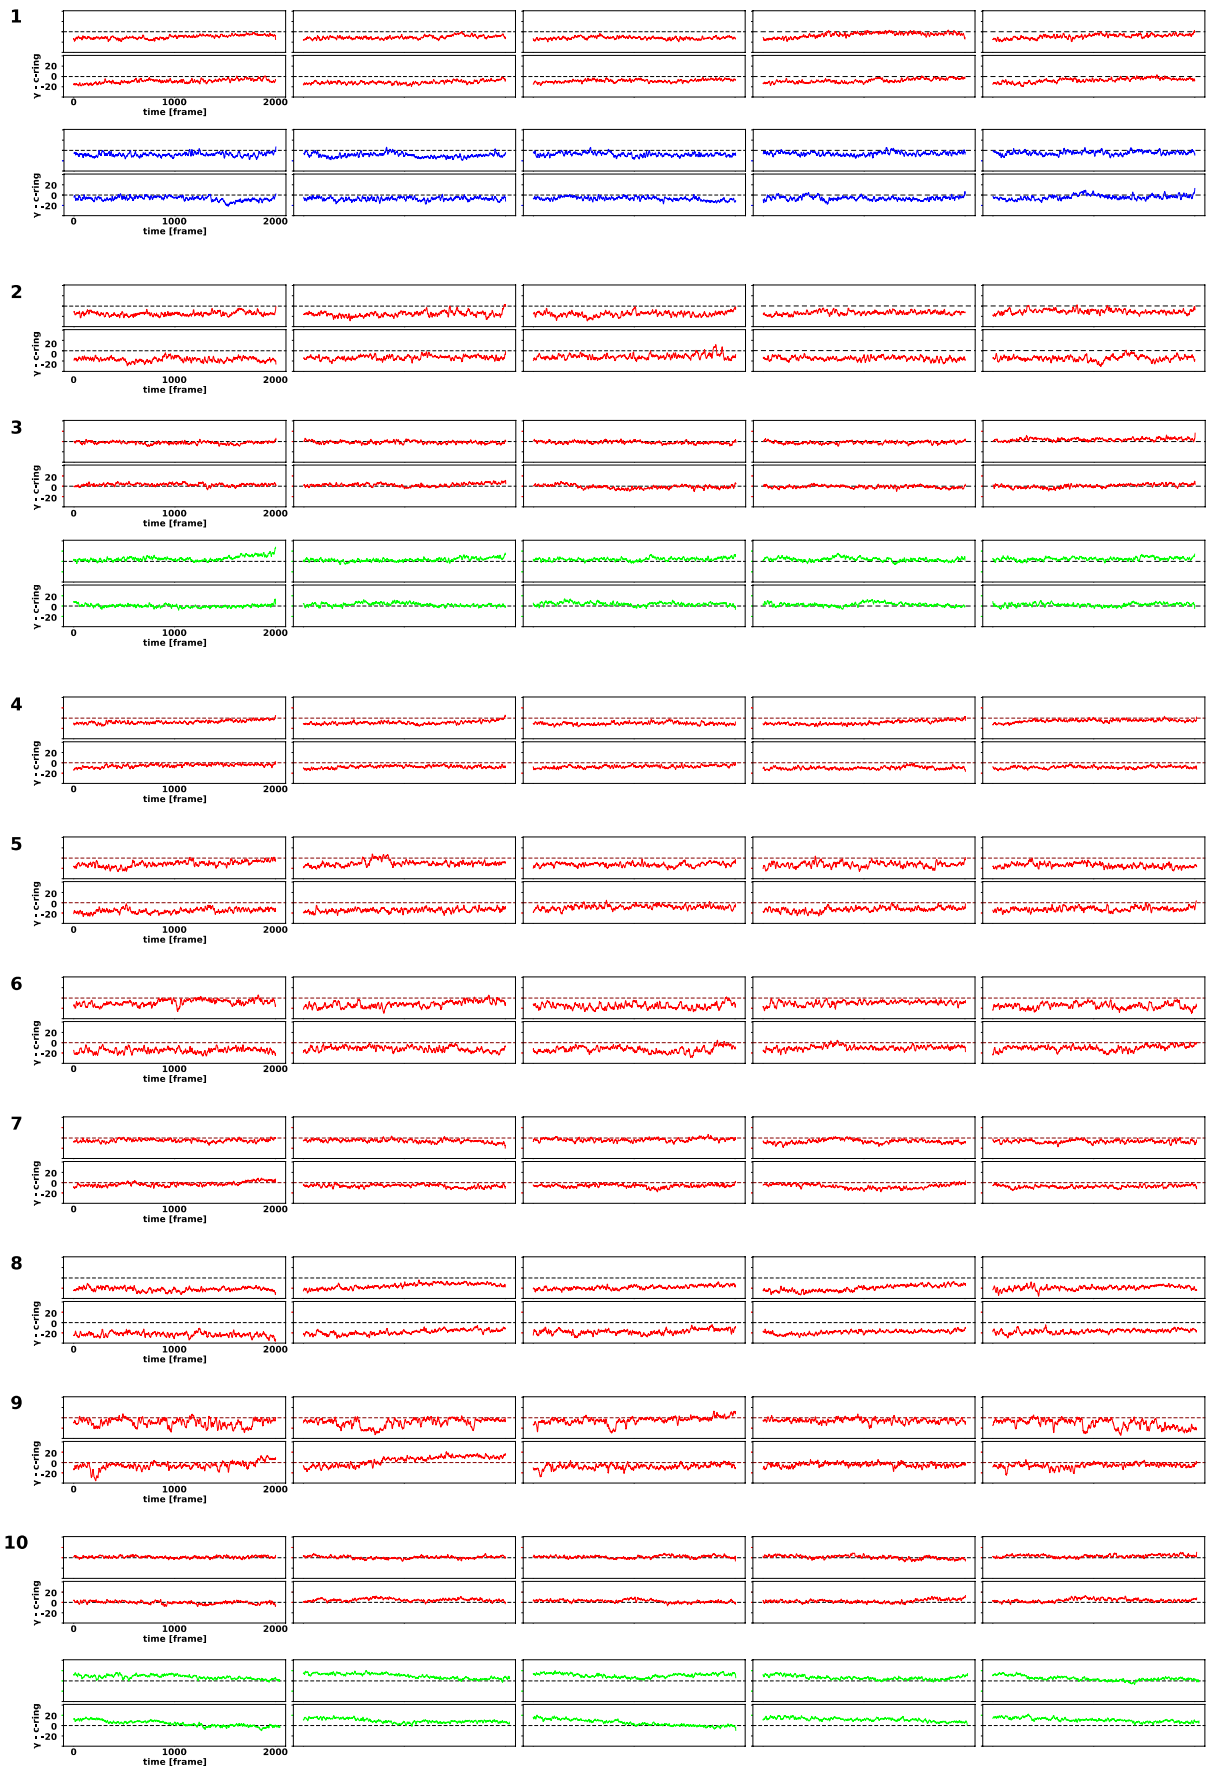

25

26 **Supplementary Fig. 3 The rotor distortion trajectories in the relaxation simulations**

27 The rotor distortion trajectories for the relaxation simulations corresponding to Fig. 4bcd.

28

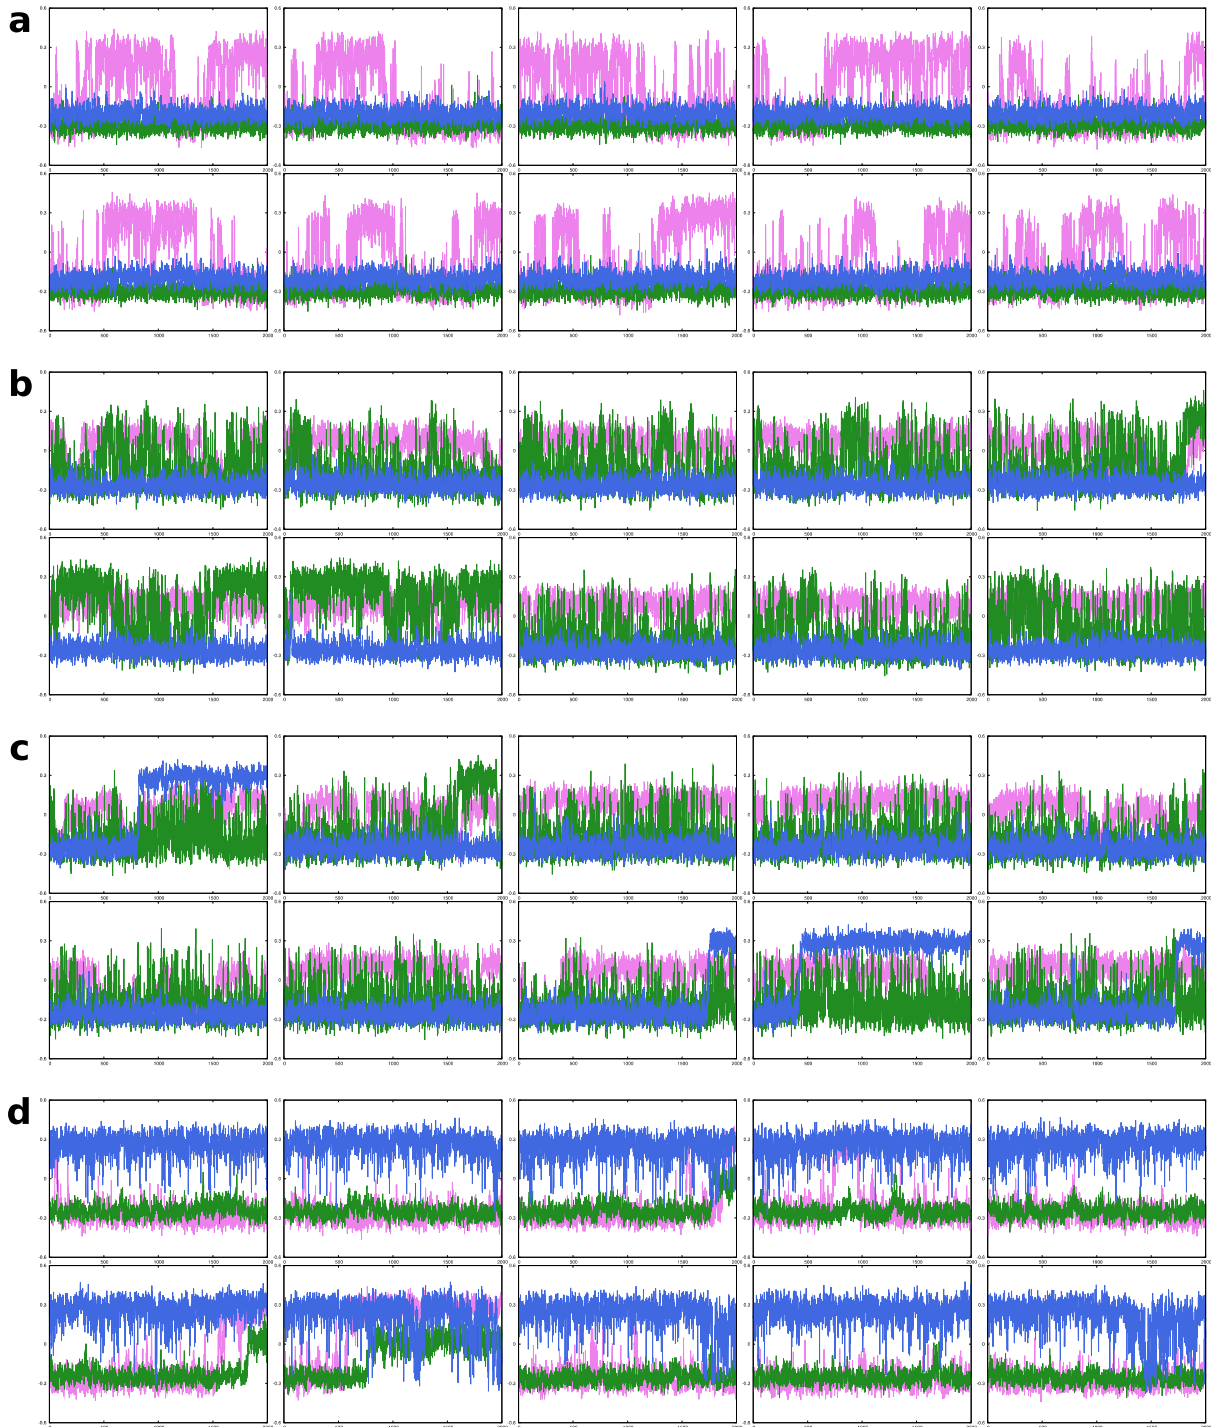

29

30 **Supplementary Fig. 4 The structure changes in  $\alpha\beta$  pairs in the relaxation simulations.**

31 The reaction coordinates for the structural changes are  $\chi$  of  $\alpha\beta_1$ ,  $\alpha\beta_2$ , and  $\alpha\beta_3$  (purple, green, and

32 blue, respectively) in the relaxation simulations. **a.**  $n = 2$  (Fig. 4B). **b.**  $n = 5$  (Fig. 4C). **c.**  $n = 6$  (Fig.

33 4C). **d.**  $n = 9$  (Fig. 4D).

34

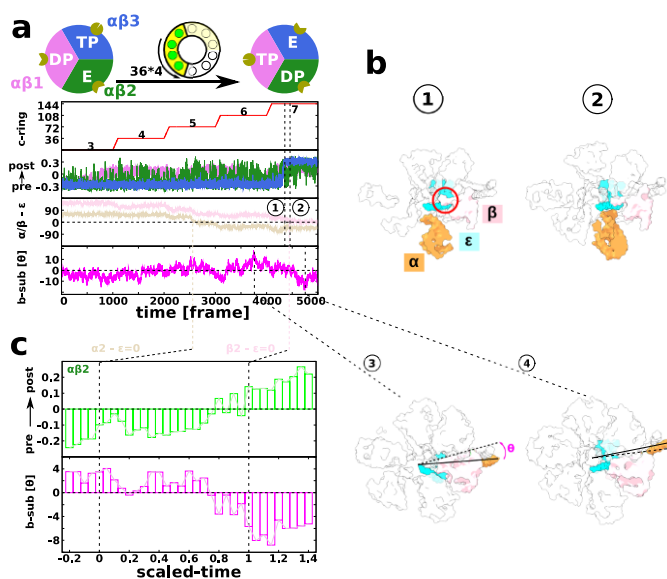

35

### 36 **Supplementary Fig. 5 Structural changes in $\alpha\beta 2$ are controlled by $\epsilon$ - and b-subunits.**

37 **a.** A representative trajectory in the BC process (the same as Figs. 2C and 3C). From top to  
 38 bottom: the rotation angle of the  $c_{10}$ -ring (red); the reaction coordinates  $\chi$  to monitor the pre-  
 39 to-post transition for  $\alpha\beta 1$ ,  $\alpha\beta 2$ , and  $\alpha\beta 3$  in red, green, and blue, respectively; the angle  $\angle\alpha O\epsilon$   
 40 and  $\angle\beta O\epsilon$  in pale orange and pale pink, respectively; and the angle  $\angle b O\beta$  in magenta. **b.**  
 41 Snapshots corresponding to time points marked by encircled numbers 1-4 in Fig. 5A, 1 and 2,  
 42 where the  $\alpha$ - and  $\beta$ -subunits of  $\alpha\beta 2$  are in orange and pink, respectively. In 3 and 4,  $\beta$ -,  $\epsilon$ -, and  
 43 b-subunits of  $\alpha\beta 2$  are in pink, cyan, and orange, respectively. **c.** The averaged changes of  $\alpha\beta 2$   
 44 reaction coordinate  $\chi$  and angle  $\angle b O\beta$  for  $\beta$ -subunit of  $\alpha\beta 2$  along the scaled time.

45

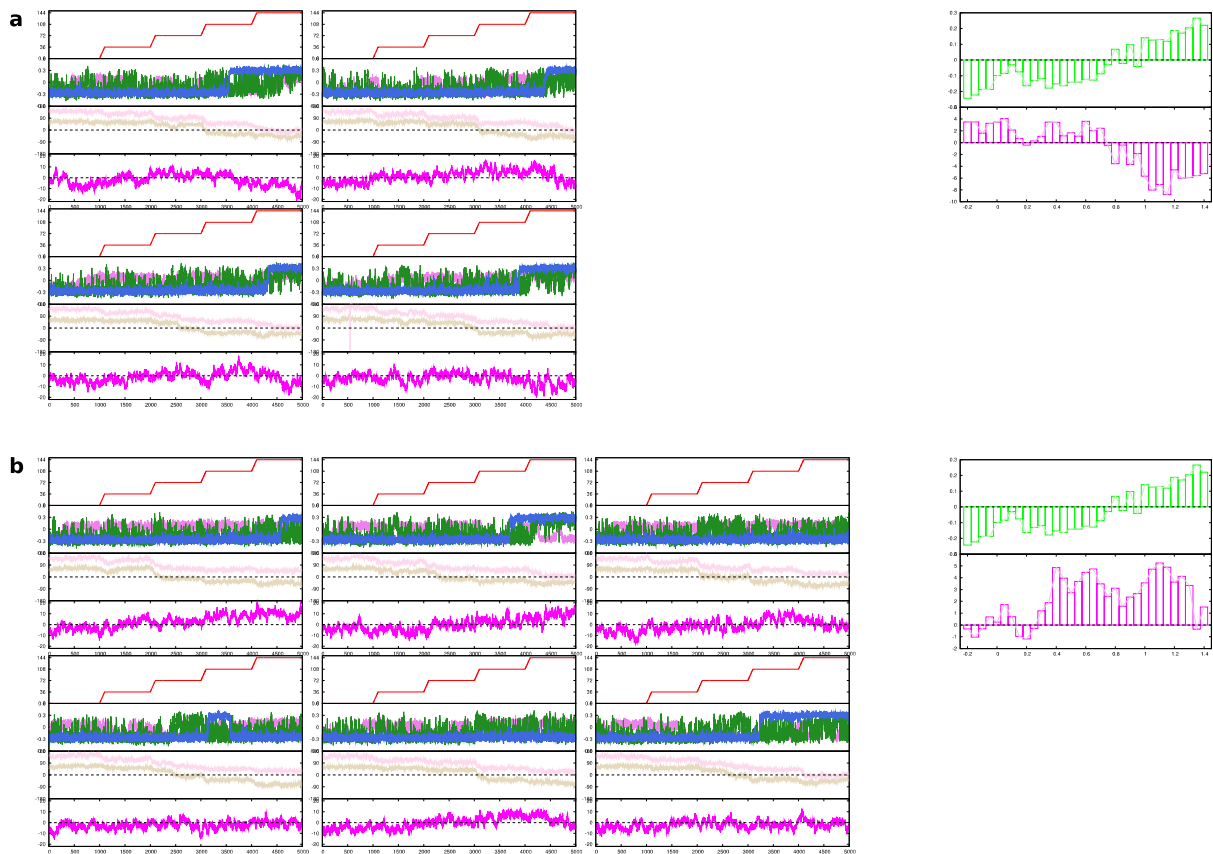

46

47 **Supplementary Fig. 6** The structural changes in  $\alpha\beta$  pairs and the angle between  $\varepsilon$ - and  $\alpha/\beta$ -  
 48 subunit of  $\alpha\beta_2$  on the scaled time.

49 **a (Left)**. The BC process trajectories in which all  $\alpha$ s completed their conformation changes within the  
 50 simulation time. **a (Right)**. The changes in  $\alpha\beta_2$   $\chi$ -value and the angle between the b-subunit and the  $\beta$ -  
 51 subunit of  $\alpha\beta_2$  on the scaled time axis were average from **Supplementary Fig. 5a** trajectories (the  
 52 upper green and lower magenta, respectively) (same with **Supplementary Fig. 5c**). **b (Left)**. The BC  
 53 process trajectories in which some of the  $\alpha$ s did not complete the structural change. **b (Right)**. The  
 54 changes in  $\alpha\beta_2$   $\chi$ -value and the angle between the b-subunit and the  $\beta$ -subunit of  $\alpha\beta_2$  on the scaled  
 55 time axis were average from **Supplementary Fig. 6b** trajectories.

56 **Supplementary Tables**

57 **Supplementary Table 1 The list of  $\Delta$  and  $\Delta V$ .**

|                   | AB            |            | BC            |            | CA            |            | sum of $\Delta V$ |
|-------------------|---------------|------------|---------------|------------|---------------|------------|-------------------|
|                   | $\Delta^{1)}$ | $\Delta V$ | $\Delta^{1)}$ | $\Delta V$ | $\Delta^{1)}$ | $\Delta V$ |                   |
| $\alpha\beta 1$   | 600           | -60        | 860           | +5         | 770           | +80        | +25               |
| $\alpha\beta 2$   | 770           | +40        | 600           | -45        | 860           | +23        | +13               |
| $\alpha\beta 3$   | 860           | -85        | 770           | +55        | 600           | +22        | -3                |
| sum of $\Delta V$ |               | -105       |               | +15        |               | +125       | +35 <sup>2)</sup> |

58 <sup>1)</sup> The unit of  $\Delta$  and  $\Delta V$  is kcal/mol.  $\Delta = 600$  kcal/mol corresponds to the transition from E to DP,  $\Delta =$

59 770 kcal/mol corresponds to the transition from TP to E, and  $\Delta = 860$  kcal/mol corresponds to the transition  
60 from DP to TP.

61 <sup>2)</sup> Note that  $\Delta V$  represents the shift in the internal energy of the post-state relative to the pre-state. The free  
62 energy difference should be different because of the difference in the conformational entropy. However, the  
63 sum of all the  $\Delta V$  represents the free energy change in the  $F_1$  motor during one round of ATP synthase rotation  
64 because the initial and final states should have the same conformational entropy.

65

66 **Supplementary Movie.**

67 **Supplementary Movie 1 Overview of ATP synthesis.**

68 The movie shows the results of the representative trajectory that achieved the 3-4-3 pathway  
69 (corresponding to the red curve in Fig. 4) for the AB (15 s), BC (25 s), and CA (20 s) processes. Top-  
70 left, the canonical view, which is the same view as Fig. 1a; bottom-left, 90° rotation from the  
71 canonical view around the z-axis; top-right, 90° rotation from the canonical view around the x-axis;  
72 bottom-right, a cross-section from the top-right view, which helps recognize the conformational  
73 changes. The color scheme is the same as that in Fig. 1a, except that the red color is used to highlight  
74 the C-terminal region of three  $\beta$ -subunits that cause significant nucleotide-dependent conformational  
75 changes.

76

## 77 **Supplementary Text.**

### 78 **Supplementary Text 1**

#### 79 **The 4-3-3 pathway.**

80 In the two of ten trajectories in the AB process, four  $c_{10}$ -ring rotation steps were necessary to induce  
81 the transition as shown in Fig. 2b. For the trajectory in Fig. 2b, the  $F_1$  stator angle kept rotated until  
82 the simulation ended (Fig. 3b). At the end of the simulation, the  $c_{10}$ -ring rotated  $4 \times 36^\circ$ , whereas the  
83  $F_1$  motor made one transition rotating the chemical states by  $120^\circ$ . The resulting difference,  $4 \times 36^\circ -$   
84  $120^\circ = 24^\circ$ , may be absorbed by the  $F_1$  stator rotation angle  $\theta$  (Fig. 3b). The PC1 of the b-subunit  
85 distortion changed in parallel with the  $F_1$  stator rotation, as in the case of the BC process of the 3-4-3  
86 pathway. In fact, we found many similarities between the AB process which needed four  $c_{10}$ -ring  
87 rotation step (Fig. 3b) and the BC process of the 3-4-3 pathway (Fig. 3c): (i) The  $F_1$  stator rotated at  
88 the end of the process, (ii) The b-subunit was distorted in parallel with the rotation of the  $F_1$  stator,  
89 and (iii) four c-ring  $36^\circ$ -rotation steps were necessary to induce a complete transition in  $F_1$ .

90 Then, using the 4000th frame snapshot of the AB process trajectory shown in Fig. 2b as the  
91 initial structure, we performed BC process simulation. We depict a representative trajectory in Fig. 2d  
92 (all the trajectories shown in Supplementary Fig. 1c).  $\alpha\beta 1$  changed from the DP to the TP state at the  
93 beginning of the simulation, as in the trajectory shown in Fig. 2d. Afterward,  $\alpha\beta 3$  made an irreversible  
94 transition from the TP to E states at the  $\sim 3100$ th frame immediately after the third c-ring rotation step  
95 in the BC process is complete. Notably, including the AB process, this corresponds to the seventh c-  
96 ring rotation step, which is in accordance with the above case. After a while,  $\alpha\beta 2$  settled down in the  
97 post-state, the DP state, at the  $\sim 4200$ th frame. This process can be termed the 4-3-3 pathway.

98 Lastly, we also simulated two other types of CA processes, starting from the 3800th and  
99 4500th frames of the BC process trajectory in Fig. 2d. In both cases, only one trajectory completed the  
100  $F_1$  transition by the end of the simulations (Supplementary Fig. 2a, snapshots of 1000 frames from  
101 each representative trajectory in Supplementary Fig. 2b). In all cases, the  $\beta$ -subunit was strongly  
102 curved from its original position, and  $\alpha\beta 3$  was found to be dissociated from  $\alpha\beta 1$  and  $\alpha\beta 2$ , suggesting  
103 the failure of these simulations.



104

105

## 106 **Supplementary Text 2**

### 107 **The $\epsilon$ passing through the side of b-subunit**

108 To complete the  $F_1$  structure change in the BC process of the 3-4-3 pathway, the  $c_{10}$ -ring needs to  
109 rotate four  $36^\circ$ -rotation steps, i.e., one step more than in the other processes. The symmetry mismatch  
110 between  $F_O$  and  $F_1$ , together with the partial rotation of the  $F_1$  stator, primarily explains the need for  
111 an extra proton transfer, which will be discussed further in the next section. However, there should be  
112 another reason why the BC process, but not the other processes, requires an extra  $36^\circ$ -rotation step.  
113 We, therefore, investigated the order of structure transitions among the three  $\alpha\beta$  pairs within the total  
114 30 trajectories in the AB, BC, and CA processes of the 3-4-3 pathway (Supplementary Fig. 1abd). Of  
115 the 30 trajectories, 20 completed all structural transitions in the three  $\alpha\beta$  pairs. Additionally, we found  
116 that in 18 of the 20 cases, the structural change in  $\alpha\beta_2$  was completed at the end. The structural  
117 changes in  $\alpha\beta_2$  tended to be late in the process. Of the three  $\alpha\beta$  pairs,  $\alpha\beta_2$  is unique in that it is in  
118 loose contact with the b-subunit, which may cause this delay in the transition.

119 The trajectory in Supplementary Fig. 5a is a typical trajectory in the BC process (the same as  
120 in Fig. 2c). Supplementary Fig. 5b depicts snapshots before and after the structural change in  $\alpha\beta_2$   
121 (Supplementary Fig. 5a, numbers 1 and 2, respectively). In the pre-state, the  $\beta$ -subunit of  $\alpha\beta_2$  is  
122 trapped by the  $\epsilon$ -subunit. At the beginning of the post-state, the  $\epsilon$ -subunit pushes the  $\beta$ -subunit  
123 outward (moved to the right direction in the figure). Therefore, the timing of the structural change in  
124  $\alpha\beta_2$  may be controlled by the interactions and positional relationship between  $\alpha\beta_2$  and the  $\epsilon$ -subunit.

125 To quantitatively evaluate the positional relationship between the  $\alpha/\beta$ -subunits and the  $\epsilon$ -  
126 subunit, we defined the angles,  $\angle\alpha O\epsilon$  (and  $\angle\beta O\epsilon$ ), by the representative position of the  $\alpha$ -subunit (the  
127  $\beta$ -subunit), the rotational center, and the representative position of the  $\epsilon$ -subunit. The representative  
128 positions of the  $\alpha/\beta$ -subunit and the  $\epsilon$ -subunit are the mean positions of residues, i.e., the 385th–398th  
129 residues and the 101st–112th residues, respectively. The third row of Supplementary Fig. 5a shows  
130 the time courses of  $\angle\alpha O\epsilon$  and  $\angle\beta O\epsilon$  of  $\alpha\beta_2$ . We found that  $\angle\beta O\epsilon$  changed its sign when  $\alpha\beta_2$

131 completed its structural transition to the post-state. The same tendency was observed for the other  
132 trajectories in the BC process (Supplementary Fig. 1b).

133 To make averaging over multiple trajectories possible, we introduced a scaled time. When  
134  $\angle\alpha O\varepsilon$  is  $0^\circ$ , we set the scaled time to 0. In addition, when  $\angle\beta O\varepsilon$  is  $0^\circ$ , we set the scaled time to 1.  
135 Thus, the scaled time is formally defined as:

$$\text{scaled time} = \frac{\text{original time} - t_{(\alpha-\varepsilon=0)}}{t_{(\beta-\varepsilon=0)} - t_{(\alpha-\varepsilon=0)}}$$

136 Using this scaled time for four trajectories in the BC process in which the structural change was  
137 correctly completed, we calculated the average  $\chi$  value of  $\alpha\beta 2$  along the scaled time (Supplementary  
138 Fig. 5c, upper panel). We confirmed that the structural change of  $\alpha\beta 2$ , on average, occurs when the  $\varepsilon$ -  
139 subunit passes through the  $\beta$ -subunit, pushing it outward.

140 Here, we anticipated that the passage of the  $\varepsilon$ -subunit through the  $\beta$ -subunit of  $\alpha\beta 2$ , and the  
141 resulting transient outward movement of the  $\beta$ -subunit, may be related to the difficulty of structural  
142 change in  $F_1$  in the BC process. Of the three  $\alpha\beta$  pairs, only  $\alpha\beta 2$  had marked contact with the b-subunit,  
143 a peripheral stalk. Therefore, the presence of the b-subunit may prevent  $\alpha\beta 2$  from undergoing  
144 transient outward motions necessary for structural changes. To monitor the positional relationship  
145 between the b-subunit and the  $\beta$ -subunit of  $\alpha\beta 2$ , Supplementary Fig. 5a (the bottom panel) plots the  
146 time course of the angle  $\angle b O \beta$  defined by the b-subunit, the rotation center, and the  $\beta$ -subunit of  $\alpha\beta 2$ .  
147 This angle was defined as positive if the  $\alpha\beta 2$   $\beta$ -subunit was located in the counterclockwise direction  
148 of the b-subunit (Supplementary Fig. 5b, lower left) and approached zero when the  $\beta$ -subunit was  
149 closest to the b-subunit. We see that the b-subunit can touch the  $\beta$ -subunit from the outside in some  
150 cases, but not in other cases (Supplementary Fig. 5b, lower left and right, respectively; dashed lines 3  
151 and 4). By plotting the average value of this angle calculated from the four trajectories in the BC  
152 process using the scaled time, we found that this angle approaches zero when the  $\chi$  value of  $\alpha\beta 2$   
153 changes its sign (Supplementary Fig. 5c lower, Supplementary Fig. 6a). Interestingly, this angle did  
154 not cross the zero line in the other six trajectories in which the conformational change was not  
155 successful (Supplementary Fig. 6b).

156 In summary, the  $\beta$ -subunit of  $\alpha\beta 2$  is supported by the b-subunit from the outside, and thus, it  
157 is not easy to move outward. In the BC process of the 3-4-3 pathway, the  $\epsilon$ -subunit passes through the  
158 side of  $\alpha\beta 2$ , at which the  $\epsilon$ -subunit tends to push the  $\beta$ -subunit of  $\alpha\beta 2$  outward. However, due to its  
159 support by the b-subunit from the outside, the  $\beta$ -subunit cannot readily move outward. This may cause  
160 an extra bottleneck and contribute to the reason why the BC process requires an extra  $36^\circ$ -rotation step  
161 of the  $c_{10}$ -ring.

162

163

### 164 **Supplementary Text 3**

#### 165 **Comparative study of cryo-EM structure models**

166 Our MD simulations showed that ATP synthase exhibits structural changes in multiple elements,  
167 which together may resolve the symmetry mismatch. Motivated by these results, in this section, we  
168 present a brief comparative survey of structural changes found in the three recent cryo-EM studies: i)  
169 the *Bacillus* PS3 ATP synthase by Guo *et al.*, ii) *E. coli* ATP synthase by Sobti *et al.*, and iii)  
170 *Polytomella* sp. ATP synthase by Murphy *et al.* Note that all these ATP synthases contain ten c-  
171 subunits in the c-ring, making the comparison easy. The first two are from bacteria and resemble each  
172 other in all the subunit architecture, whereas the third one is from eukaryote mitochondria and is  
173 naturally more divergent from the first two.

174 To analyze all the structural changes comprehensively, for convenience, we chose the  $F_O$   
175 stator, the a-subunit, as the reference point. Relative to this, we calculated the rotation of four parts of  
176 the complex around the rotation axis: (i) the rotation of the  $c_{10}$ -ring, (ii) the rotor distortion defined by  
177 the rotation of the upper part of the  $\gamma$ -subunit that interacts with the  $F_1$  stator relative to the rotation of  
178 the  $c_{10}$ -ring, (iii) the rotation of the  $F_1$  stator relative to the  $F_O$  stator, and (iv) the rotation within the  $F_1$   
179 motor, defined by the rotation of the  $\gamma$ -subunit relative to the  $F_1$  stator  $\alpha_3\beta_3$ . Note that, by definition,  
180 there is a relation: (i)+(ii)=(iii)+(iv). The rotation in (iii) can be attributed to the distortion in the b-  
181 subunits. All the rotations are measured from the starting point, which is chosen as the A state of Guo

182 *et al.* or the equivalent one (the rotation state  $n = 0$ ). Then, the B state has an ideal mismatch angle of  
183  $3 \times 36^\circ - 120^\circ = -12^\circ$ , whereas the C state has an ideal mismatch angle of  $7 \times 36^\circ - 240^\circ = 12^\circ$ .

184 Results of structure comparisons are given in **Table 1**.

185 In the *Bacillus* PS3 ATP synthase structures by Guo *et al.*, the B state, which corresponds to  
186 the state  $n = 3$ , has an ideal rotation angle of  $c_{10}$ -ring,  $3 \times 36^\circ = 108^\circ$ , as well as a nearly ideal  $F_1$  motor  
187 angle of  $119^\circ$ . The deviation is nearly solely absorbed by the rotation of the  $F_1$  stator via the distortion  
188 of the b-subunit. In the C state  $n = 7$ , the  $c_{10}$ -ring angle deviates from the ideal one by  $4^\circ$ , while the  $F_1$   
189 stator rotates clockwise by  $9^\circ$ . Together, these account for the resolution of the mismatch. The rotor is  
190 very rigid with no distortion in both states, and the  $F_1$  motor angle deviates slightly from the ideal  
191 value.

192 In the *E. coli* ATP synthase structures by Sobti *et al.*, the 2A (or 2 B), 1A, 1C, and 3A states  
193 correspond to the  $c_{10}$ -ring rotation step  $n = 0, 3, 4$ , and  $7$ . Note that the states  $n = 3$  and  $n = 4$   
194 possess identical chemical states of  $F_1$ . Among the four structures, the  $F_1$  stator rotates by  $15^\circ$ ,  
195 whereas the rotor was distorted by  $8^\circ$ . In addition, the  $c_{10}$ -ring rotation angles deviate from the ideal  
196 angle up to  $13^\circ$ . Note that this deviation of the c-ring angle from the ideal angle also serves as an  
197 elastic element. These three elements contributed significantly to solving the mismatch. On the other  
198 hand, the  $F_1$  motor angle changes slightly from the ideal value ( $\sim 3^\circ$ ).

199 In the *Polytomella* sp., ATP synthase structures by Murphy *et al.* in the 1A, 1F, 2A, 2D, 3A,  
200 and 3C states correspond to the  $c_{10}$ -ring rotation step  $n = 0, 1, 3, 4, 7$ , and  $8$ . For simplicity, we chose  
201 the two terminal states in each primary step, removing several states in between from the analysis.  
202 Among the six structures, the  $F_1$  stator rotated by  $\sim 28^\circ$ , whereas the rotor was distorted by as much as  
203  $22^\circ$ . The  $c_{10}$ -ring rotation angles deviated from the ideal angle up to  $11^\circ$ . In contrast to the above two  
204 cases, a marked deviation in the  $F_1$  motor angle by  $12^\circ$  was also observed.

205 Comparing the three cases, we found that the primary source of elasticity used to resolve the  
206 symmetry mismatch in these cryo-EM structures was the rotation of the  $F_1$  stator relative to the  $F_0$   
207 stator, which was realized by the distortion of the b-subunit. However, the distortion of the rotor, as  
208 well as the deviation of the  $c_{10}$ -ring angle from the ideal angle, also contributed to reducing the

209 mismatch. Quantitatively, some differences existed among the three cases, which were primarily  
 210 attributed to intrinsic differences between different species.

211

212

## 213 **Supplementary Text 4**

### 214 **The AICG2+ model**

215 As described, we primarily used the AICG2+ model, in which the potential can be expressed as

$$V_{AICG2+} = V_{local} + V_{nonlocal}$$

216 Here, the local potential has the following terms,

$$V_{local} = \sum_{i \in bond} k_{bond,i} (b_i - b_{0,i})^2 + \sum_{i \in angle} V_{angle}(\theta_i) + \sum_{i \in dihedral} V_{dihedral}(\varphi_i) \\ + \sum_{ij \text{ s.t. } j=i+2} \varepsilon_{local \ Go,ij} e^{-(r_{ij}-r_{ij,0})^2/2w_{ij}^2} + \sum_{ij \text{ s.t. } j=i+3} \varepsilon_{local \ Go,ij} e^{-(\varphi_{ij}-\varphi_{ij,0})^2/2w_{\varphi ij}^2}$$

217 The first term restrains the virtual bond length between adjacent Ca.  $b_i$  is the  $i$ th virtual bond length.

218 The second and third terms are generic statistical potentials for the virtual bond angles and virtual

219 dihedral angles, respectively, which depend on the amino acid type.  $\theta_i$  and  $\varphi_i$  are the angles between

220 two consecutive virtual bonds and the dihedral angle, respectively. The fourth and fifth terms are

221 structure-based local contact potentials for amino acids  $i$  and  $i+2$ , and for  $i$  and  $i+3$ , respectively (

222  $\varphi_{ii+3}$  represents the dihedral angle defined by the four amino acids,  $i$ ,  $i+1$ ,  $i+2$ , and  $i+3$ ). The nonlocal

223 potential is written as:

224

$$V_{nonlocal} = \sum_{ij \in contact} \varepsilon_{Go,ij} \left[ 5 \left( \frac{r_{ij,0}}{r_{ij}} \right)^{12} - 6 \left( \frac{r_{ij,0}}{r_{ij}} \right)^{10} \right] + \sum_{ij \notin contact} \varepsilon_{ex} \left( \frac{d}{r_{ij}} \right)^{12}$$

225

226 where the first term is the structure-based contact potential applied to the non-local amino acid pairs

227 that are in contact with the reference structure, whereas the second term is a generic repulsion

228 between non-local amino acid pairs that do not form a contact.  $\epsilon_{Go,ij}$  and  $\epsilon_{local\ Go,ij}$ , were determined  
229 based on the atomic interaction energy estimate at the reference structure.

230 The details require further explanation. First, we used the AICG2+ for all the intra-subunit  
231 interactions, as well as for all the subunit-subunit pairs that would keep contact throughout the  
232 simulation with the default parameter set between the  $\alpha$ -subunit and  $\beta$ -subunits, between any  $\gamma$ -subunit  
233 and  $\epsilon$ , between any  $\gamma$ -subunit and  $\delta$ , between  $\alpha$  and  $\beta$  that sandwich the catalytic site, between two  $\beta$ -  
234 subunits, and between  $\delta$  and  $\alpha\beta$ . Second, since the  $\beta$ -subunit, especially  $\beta_2$ , had a few missing  
235 residues at the C-terminal region, the reference model could not express enough contact with the  $\delta$ -  
236 subunit, and within the AICG2+ model, we set the attractive interaction  $\epsilon_{Go,ij}$  between the  $\beta$ -subunit  
237 and  $\delta$ -subunit to be ten times stronger than the default. Third, for the fragile interface between  $\alpha$ - and  
238  $\beta$ -subunits that do not have catalytic sites, we weakened their interaction by 0.7 times, which  
239 facilitated the state transitions. Note that the interaction between the  $\beta$ -subunit and  $\alpha\beta$  is the only  
240 excluded volume term without structure-based contact potential.

241 Lastly, and most importantly, we carefully designed an attractive interaction between the  $F_1$   
242 stator  $\alpha/\beta$ -subunit and the  $F_1$  rotor  $\gamma/\epsilon$ -subunit. Importantly, the rotor  $\gamma/\epsilon$  rotated with respect to the  
243 stator  $\alpha_3\beta_3$  during the simulation, whereas the reference structure contained native contact information  
244 present only in one rotation angle. Based on the set of native contacts for one  $\alpha$ - or  $\beta$ -subunit in the  
245 reference, we copied them to the same residues in the other two  $\alpha$ - or  $\beta$ -subunits. For example,  
246 suppose that the  $j^{th}$  residue of the  $\gamma$ -subunit was in contact with the  $i^{th}$  residue of the  $\alpha$ -subunit 1 in  
247 the A state, we added the  $j^{th}$  residue of the  $\gamma$ -subunit and the  $i^{th}$  residue of the  $\alpha$ -subunits 2 and 3 to  
248 the native contact set. When the same residue pair had two types of native contacts originating from  
249 different subunits, we chose the native contact with a smaller distance because the latter was  
250 considered stronger. Given this duplication of the native contact list, we rescaled  $\epsilon_{Go,ij}$  for the pair  
251 between the  $\gamma/\epsilon$ -subunit and the  $\alpha/\beta$ -subunit by 0.5 times. Additionally, we included a sequence-  
252 based general hydrophobic interaction between the  $\alpha/\beta$ -subunits and the  $\gamma/\epsilon$ -subunit<sup>1</sup>:

$$V_{HP} = - \sum_i \epsilon_{HP,i} \mathcal{S}_i(\mathbf{r})$$

253 where  $\epsilon_{HP,i}$  is an experimentally-derived energy scale of transfer free energy for the residue  $i$ , and  
254  $S_i(\mathbf{r})$  is a structure function that approximates buriedness of the residue  $i$ .

255

256

## 257 **Supplementary Text 5**

### 258 **The double basin model for the F<sub>1</sub> motor**

259 The double-basin model enables the simulation of the structural change between two reference  
260 structures by connecting two potential energies defined by AICG2+<sup>2</sup>. The double-basin potential was  
261 defined as the smaller eigenvalue of the following eigenvalue equation:

$$\begin{pmatrix} V_I(R|R_1) & \Delta \\ \Delta & V_I(R|R_2) + \Delta V \end{pmatrix} \begin{pmatrix} c_1 \\ c_2 \end{pmatrix} = V_{MB,I} \begin{pmatrix} c_1 \\ c_2 \end{pmatrix}$$

262 and, the smaller eigenvalue, the double-basin potential, can be written as follows:

$$V_{MB,I} = \frac{V_I(R|R_1) + V_I(R|R_2) + \Delta V}{2} - \sqrt{\left(\frac{V_I(R|R_1) - V_I(R|R_2) - \Delta V}{2}\right)^2 + \Delta^2}$$

263 Here,  $V_I(R|R_v)$  is the original AICG2+ potential energy for the  $I$ -th group in the system, and  $v = 1, 2$   
264 represent the pre- and post- reference structures. In our system, we introduced three double basin  
265 systems for the three pairs of  $\alpha\beta$ s:  $\alpha\beta1$ ,  $\alpha\beta2$ , and  $\alpha\beta3$ . In the AB process simulation,  $\alpha\beta1$  should have  
266 two basins corresponding to the E and DP states (see Fig. 1c).  $V_{\alpha\beta1}(R|R_1)$  contains intra-subunit  
267 interactions of  $\alpha1$ - and  $\beta1$ -subunits as well as inter-subunit interactions between  $\alpha1$  and  $\beta1$ , and  
268 between  $\beta1$  and  $\alpha2$ .

269 Each double-basin model contains two key parameters  $\Delta$  and  $\Delta V$ .  $\Delta$  controls the potential  
270 barrier height, and  $\Delta V$  represents the relative stability of the two basins. The same value,  $\Delta$  was used  
271 for each nucleotide state change, independent of the system. In contrast,  $\Delta V$  was adjusted for each  
272 system and each type of structural change. Because the energy of the three ATP molecules  
273 synthesized in one cycle, AB, BC, and CA, was approximately  $10 \times 3 = 30 \text{ kcal/mol}$ , we ensured  
274 that the total  $\Delta V$  of the whole system was also  $+30 \text{ kcal/mol}$ . The  $\Delta$  and  $\Delta V$  values for each system  
275 in each process are summarized in Supplementary Table 1. In addition, by using the eigenvectors  
276  $(c_1, c_2)$ , we could define a reaction coordinate that monitored the conformational change  $\chi$ , defined as



277  $\ln(c_2/c_1)$ . When the  $\chi$  parameter was negative (positive), the system adopted the conformation in pre-  
278 state 1 (post-state 2).  
279  
280

281 **References**

- 282 1. Tanaka, T., Hori, N. & Takada, S. How Co-translational Folding of Multi-domain Protein Is  
283 Affected by Elongation Schedule: Molecular Simulations. *PLoS Comput. Biol.* **11**, 1–20  
284 (2015).
- 285 2. Okazaki, K., Koga, N., Takada, S., Onuchic, J. N. & Wolynes, P. G. Multiple-basin energy  
286 landscapes for large-amplitude conformational motions of proteins: Structure-based molecular  
287 dynamics simulations. *Proc. Natl. Acad. Sci. U. S. A.* **103**, 11844–11849 (2006).
- 288
